# Supplementary material for: Direct methylation and carbonylation of in situ generated arynes via HDDA-Wittig coupling
Source: Royal Society of Chemistry journal article supplement (doi:10.1039/c9qo00621d), 2019-01-01

# Supplementary Information

## Direct Methylation and Carbonylation of in Situ Generated Aryne via HDDA-Wittig Coupling

Baohua Liu, Chunyan Mao, Qiong Hu, Liangliang Yao, and Yimin Hu\*

*School of Chemistry and Materials Science, Anhui Normal University,*

*Wuhu, Anhui 241002, China E-mail: [yiminhu@ahnu.edu.cn](mailto:yiminhu@ahnu.edu.cn)*

### Contents

|                                                                          |     |
|--------------------------------------------------------------------------|-----|
| 1. General Experimental Procedures.....                                  | S2  |
| 2. Compound Data of Tetrynes <b>1</b> .....                              | S3  |
| 3. Characterization Data for the New Compounds.....                      | S7  |
| 4. X-Ray Structure for <b>3h</b> and <b>3y</b> .....                     | S18 |
| 5. <sup>1</sup> H and <sup>13</sup> C NMR Spectra for New Compounds..... | S19 |

#### 1. General experimental procedures

All the catalytic reactions were performed under an argon atmosphere using the oven-dried Schlenk flask. The chemicals were purchased from Alfa Aesar and Acros Chemicals. All solvents and materials were pre-dried, redistilled or recrystallized before use.  $^1\text{H}$  NMR (300 MHz) and  $^{13}\text{C}$  NMR (125 MHz) spectra were recorded on a Bruker Avance 300 spectrometer with  $\text{CDCl}_3$  as the solvent. Chemical shifts are reported in ppm by assigning TMS resonance in the  $^1\text{H}$  NMR spectra as 0.00 ppm and  $\text{CDCl}_3$  resonance in the  $^{13}\text{C}$  spectra as 77.0 ppm. All coupling constants ( $J$  values) were reported in Hertz (Hz). Column chromatography was performed on silica gel 300–400 mesh. Melting points were determined using a Gallenkamp melting point apparatus and are uncorrected. The FT-IR spectra were recorded from KBr pellets or thin film from  $\text{CHCl}_3$  on the NaCl window in the 4000-400  $\text{cm}^{-1}$  ranges on a Nicolet 5DX spectrometer. High-resolution mass spectra were recorded on an Agilent model G6220 mass spectrometer (APCI). X-ray Crystallography diffraction data of **3h** and **3y** were collected at room temperature with a Bruker SMART Apex CCD diffractometer with Mo- $K\alpha$  radiation ( $\lambda = 0.71073 \text{ \AA}$ ) with a graphite monochromator using the  $\omega$ -scan mode. Data reductions and absorption corrections were performed with SAINT and SADABS software, respectively. The structure was solved by direct methods and refined on  $F^2$  by full-matrix least squares using SHELXTL. All non-hydrogen atoms were treated anisotropically. The positions of hydrogen atoms were generated geometrically.

### General procedures:

Typical experimental procedure: Tetraynes (1.0 equiv), (carbomethoxymethylene)triphenylphosphorane (1.05 equiv), Water (2.0 equiv), were added to toluene (1.5 mL), the mixture was stirred at room temperature for half an hour and then heated at 100°C for 9 hours under argon. The reaction mixture was cooled to room temperature, and the solvent was evaporated in vacuo. The residue was purified by preparative thin-layer chromatography (TLC) on silica gel with the appropriate mixture of petroleum ether and ethyl acetate to give the fused multifunctionalized ethyl 2-methylbenzoates or *o*-tolylethanones derivatives.

## 2. Compound Data of Tetraynes 1

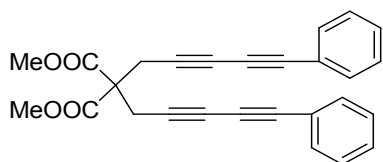

#### Dimethyl 2,2-bis(5-phenylpenta-2,4-diyn-1-yl)malonate

Yellow solid; 3.06 g (75% yield); m.p. 96-97°C; <sup>1</sup>H NMR (300 MHz, CDCl<sub>3</sub>): δ 7.48-7.46 (d, 4H), 7.33-7.25 (m, 6H), 3.81 (s, 6H), 3.21 (s, 4H); <sup>13</sup>C NMR (75.5 MHz, CDCl<sub>3</sub>): δ 168.6, 132.6, 129.2, 128.4, 121.5, 77.6, 76.0, 73.7, 68.5, 56.6, 53.4, 52.9, 50.5, 24.2, 19.6 ppm; FT-IR (KBr):  $\bar{\nu}$  3462, 1744, 1491, 1300, 1207, 1069, 758, 691, 527 cm<sup>-1</sup>; HRMS(APCI): *m/z* [M+H]<sup>+</sup> calcd for C<sub>27</sub>H<sub>20</sub>O<sub>4</sub>: 409.1434; found: 409.1435.

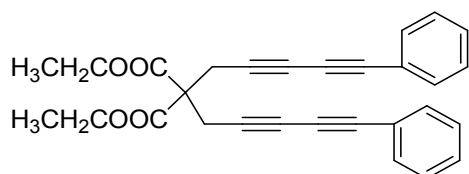

#### Diethyl 2,2-bis(5-phenylpenta-2,4-diyn-1-yl)malonate

Colorless solid; 3.40 g (78% yield); m.p. 62-63°C; <sup>1</sup>H NMR (300 MHz, CDCl<sub>3</sub>): δ 7.39-7.35 (m, 2H), 7.25 (s, 2H), 7.07-7.03 (m, 6H), 4.30-4.23 (q, J=6 Hz, 4H), 3.31 (s, 4H), 1.30-1.25 (t, J=6 Hz, 6H); <sup>13</sup>C NMR (75.5 MHz, CDCl<sub>3</sub>): δ 168.2, 132.6, 129.1, 128.4, 121.5, 77.8, 75.9, 73.8, 68.4, 62.4, 56.6, 24.1, 14.0 ppm; FT-IR (KBr):  $\bar{\nu}$  3474, 1736, 1441, 1190, 1047, 758, 691, 527 cm<sup>-1</sup>; HRMS (APCI): *m/z* [M+H]<sup>+</sup> calcd for C<sub>29</sub>H<sub>24</sub>O<sub>4</sub>: 437.1747; found: 437.1746.

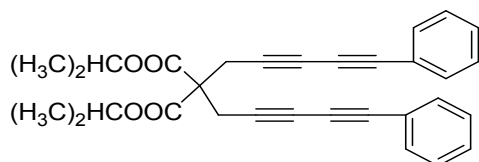

#### Diisopropyl 2,2-bis(5-phenylpenta-2,4-diyn-1-yl)malonate

Colorless solid, 3.71 g (80% yield); m.p. 130-131°C; <sup>1</sup>H NMR (300 MHz, CDCl<sub>3</sub>): δ 7.48-7.46 (m, 4H), 7.32-7.26 (m, 6H), 5.14-5.10 (m, 2H), 3.17 (s, 4H), 1.28-1.26 (d, J=6 Hz, 12H); <sup>13</sup>C NMR (75.5 MHz, CDCl<sub>3</sub>): δ 167.8, 132.6, 129.1, 128.4, 121.6, 78.0, 75.8, 73.9, 70.0, 68.3, 56.5, 24.0, 21.5 ppm; FT-IR (KBr):  $\bar{\nu}$  3466, 1732, 1302, 1219, 1120, 1952, 758, 689, 528 cm<sup>-1</sup>; HRMS (APCI): *m/z* [M+H]<sup>+</sup> calcd for C<sub>31</sub>H<sub>28</sub>O<sub>4</sub>: 465.2060; found: 465.2056.

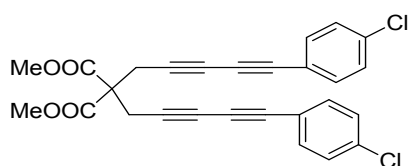

#### Dimethyl 2,2-bis(5-(4-chlorophenyl)penta-2,4-diyn-1-yl)malonate

Yellow solid, 3.90 g (82% yield); m.p. 123-124°C; <sup>1</sup>H NMR (300 MHz, CDCl<sub>3</sub>): δ 7.41-7.38 (d, 4H), 7.30-7.27 (d, 4H), 3.81 (s, 6H), 3.20 (s, 4H); <sup>13</sup>C NMR (75.5 MHz, CDCl<sub>3</sub>): δ 168.5, 135.3, 133.7, 128.8, 120.0, 78.2, 74.8, 74.7, 68.3, 56.5, 53.4, 52.9, 50.4, 24.2, 19.5 ppm; FT-IR (KBr):  $\bar{\nu}$  2447, 1740, 1489, 1433, 1302, 1213, 829, 525 cm<sup>-1</sup>; HRMS (APCI): m/z [M+H]<sup>+</sup> calcd for C<sub>27</sub>H<sub>18</sub>Cl<sub>2</sub>O<sub>4</sub>: 477.0655; found: 477.0652.

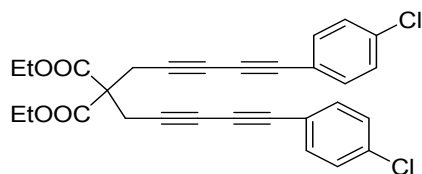

#### Diethyl 2,2-bis(5-(4-chlorophenyl)penta-2,4-diyne-1-yl)malonate

Yellow solid, 4.08 g (81% yield); m.p. 104-105°C; <sup>1</sup>H NMR (300 MHz, CDCl<sub>3</sub>): δ 7.43-7.38 (m, 4H), 7.33-7.26 (m, 4H), 4.30-4.23 (q, J = 6 Hz, 4H), 3.19 (s, 4H), 1.31-1.26 (t, J=6 Hz, 6H); <sup>13</sup>C NMR (75.5 MHz, CDCl<sub>3</sub>): δ 168.1, 135.3, 133.7, 130.9, 129.3, 128.7, 120.0, 78.4, 74.6, 72.1, 68.1, 62.4, 56.4, 24.0, 23.7, 14.0 ppm; FT-IR (KBr):  $\bar{\nu}$  3474, 1736, 1641, 1489, 1285, 1188, 1011, 837, 528 cm<sup>-1</sup>; HRMS (APCI): m/z [M+H]<sup>+</sup> calcd for C<sub>29</sub>H<sub>22</sub>Cl<sub>2</sub>O<sub>4</sub>: 505.0968; found: 505.0966.

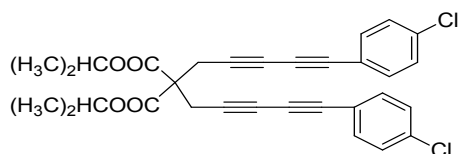

#### Diisopropyl 2,2-bis(5-(4-chlorophenyl)penta-2,4-diyne-1-yl)malonate

Yellow solid, 4.20 g (79% yield); m.p. 85-86°C; <sup>1</sup>H NMR (300 MHz, CDCl<sub>3</sub>): δ 7.40-7.38 (m, 4H), 7.29-7.26 (m, 6H), 5.14-5.10 (m, 2H), 3.16 (s, 4H), 1.28-1.26 (d, J=6Hz, 12H); <sup>13</sup>C NMR (75.5 MHz, CDCl<sub>3</sub>): δ 167.6, 135.2, 133.7, 128.7, 120.1, 78.6, 74.8, 74.6, 70.0, 68.1, 56.4, 24.0, 21.5 ppm; FT-IR (KBr):  $\bar{\nu}$  3449, 1736, 1489, 1290, 1205, 1105, 1012, 825, 525 cm<sup>-1</sup>; HRMS (APCI): m/z [M+H]<sup>+</sup> calcd for C<sub>31</sub>H<sub>26</sub>Cl<sub>2</sub>O<sub>4</sub>: 534.1034; found: 534.1039.

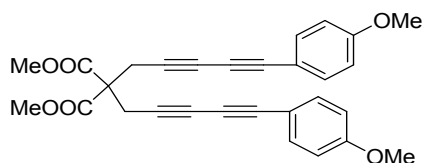

#### Dimethyl 2,2-bis(5-(4-methoxyphenyl)penta-2,4-diyne-1-yl)malonate

Yellow solid, 3.60 g (77% yield); m.p. 101-102°C; <sup>1</sup>H NMR (300 MHz, CDCl<sub>3</sub>): δ 7.44-7.41 (d, 4H), 6.84-6.82 (d, 4H), 3.81 (s, 12H), 3.21 (s, 4H); <sup>13</sup>C NMR (75.5 MHz, CDCl<sub>3</sub>): δ 168.7, 160.2, 134.2, 114.1, 113.3, 77.5, 76.1, 72.6, 68.6, 56.7, 55.3, 53.4, 24.2 ppm; FT-IR (KBr):  $\bar{\nu}$  3474, 1744, 1603, 1508, 1257, 1201, 1024, 829, 532 cm<sup>-1</sup>; HRMS (APCI): m/z [M+H]<sup>+</sup> calcd for C<sub>29</sub>H<sub>24</sub>O<sub>6</sub>: 469.1646; found: 469.1645.

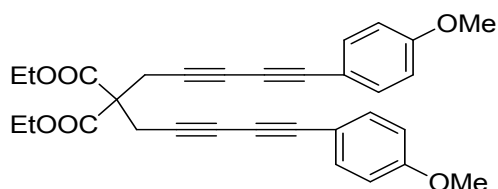

#### Diethyl 2,2-bis(5-(4-methoxyphenyl)penta-2,4-diyne-1-yl)malonate

Yellow solid, 3.92 g (79% yield); m.p. 69-70°C;  $^1\text{H}$  NMR (300 MHz,  $\text{CDCl}_3$ ):  $\delta$  7.43-7.40 (d, 4H), 6.84-6.81 (d, 4H), 4.30-4.23 (q,  $J=6$  Hz, 4H), 3.81 (s, 4H), 1.31-1.27 (t,  $J=6$  Hz, 6H);  $^{13}\text{C}$  NMR (75.5 MHz,  $\text{CDCl}_3$ ):  $\delta$  168.3, 160.3, 134.2, 114.1, 113.5, 77.3, 76.1, 72.7, 68.6, 62.3, 56.6, 55.3, 24.1, 14.1 ppm; FT-IR (KBr):  $\bar{\nu}$  3447, 1728, 1603, 1508, 1246, 1178, 829, 532  $\text{cm}^{-1}$ ; HRMS (APCI):  $m/z$   $[\text{M}+\text{H}]^+$  calcd for  $\text{C}_{31}\text{H}_{28}\text{O}_6$ : 497.1959; found: 497.1953.

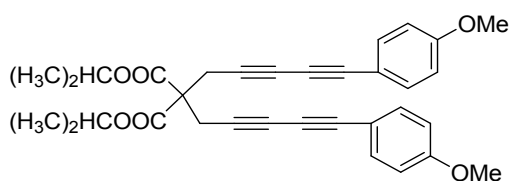

#### Diisopropyl 2,2-bis(5-(4-methoxyphenyl)penta-2,4-diyne-1-yl) malonate

Colorless crystal, 4.40 g (84% yield); m.p. 81-82°C;  $^1\text{H}$  NMR (300 MHz,  $\text{CDCl}_3$ ):  $\delta$  7.42-7.39 (d, 4H), 6.83-6.81 (d, 4H), 5.14-5.10 (m, 2H), 3.80 (s, 6H), 3.16 (s, 4H), 1.28-1.26 (d,  $J=6$  Hz, 12H);  $^{13}\text{C}$  NMR (75.5 MHz,  $\text{CDCl}_3$ ):  $\delta$  167.8, 160.2, 134.1, 114.0, 113.6, 77.4, 72.7, 69.9, 68.5, 56.6, 55.3, 24.0, 21.5 ppm; FT-IR (KBr):  $\bar{\nu}$  3447, 1734, 1600, 1508, 1292, 1254, 1211, 1101, 1028, 835, 534  $\text{cm}^{-1}$ ; HRMS (APCI):  $m/z$   $[\text{M}+\text{H}]^+$  calcd for  $\text{C}_{33}\text{H}_{32}\text{O}_6$ : 525.2272; found: 525.2275.

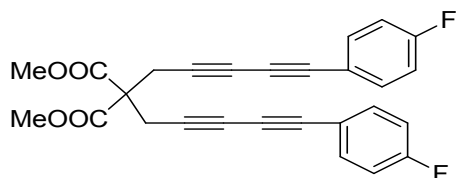

#### Dimethyl 2,2-bis(5-(4-fluorophenyl)penta-2,4-diyne-1-yl)malonate

Yellow solid, 3.69 g (83% yield); m.p. 116-117°C;  $^1\text{H}$  NMR (300 MHz,  $\text{CDCl}_3$ ):  $\delta$  7.52-7.47 (m, 4H), 7.07-7.01 (t, 4H), 3.84 (s, 6H), 3.24 (s, 4H);  $^{13}\text{C}$  NMR (75.5 MHz,  $\text{CDCl}_3$ ):  $\delta$  168.6, 164.6, 161.3, 134.6, 134.5, 117.6, 117.6, 115.9, 115.6, 77.6, 74.8, 73.5, 68.3, 56.6, 53.4, 24.1 ppm; FT-IR (KBr):  $\bar{\nu}$  3447, 1738, 1508, 1289, 1211, 1151, 1069, 837, 528  $\text{cm}^{-1}$ ; HRMS (APCI):  $m/z$   $[\text{M}+\text{H}]^+$  calcd for  $\text{C}_{27}\text{H}_{18}\text{F}_2\text{O}_4$ : 445.1246; found: 445.1246.

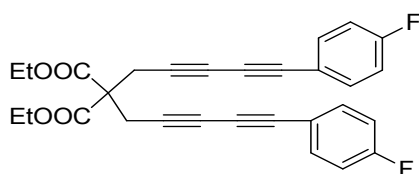

#### Diethyl 2,2-bis(5-(4-fluorophenyl)penta-2,4-diyne-1-yl)malonate

Yellow solid, 3.78 g (80% yield); m.p. 64-65°C; <sup>1</sup>H NMR (300 MHz, CDCl<sub>3</sub>): δ 7.51-7.47 (m, 4H), 7.07-7.01 (m, 4H), 4.34-4.28 (q, J=6 Hz, 4H), 3.23 (s, 4H), 1.35-1.30 (t, J=6 Hz, 6H); <sup>13</sup>C NMR (75.5 MHz, CDCl<sub>3</sub>): δ 168.1, 164.7, 161.3, 134.6, 134.6, 134.5, 134.4, 116.0, 115.9, 115.7, 115.6, 77.8, 74.8, 68.2, 62.4, 56.5, 24.1, 14.0 ppm; FT-IR (KBr):  $\bar{\nu}$  3487, 1740, 1599, 1508, 1302, 1234, 1194, 1157, 831, 528 cm<sup>-1</sup>; HRMS (APCI): m/z [M+H]<sup>+</sup> calcd for C<sub>29</sub>H<sub>22</sub>F<sub>2</sub>O<sub>4</sub>: 473.1559; found: 473.1560.

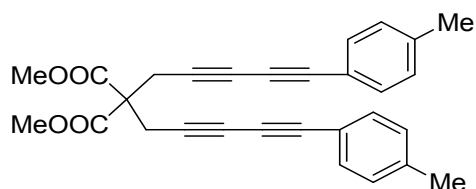

#### Dimethyl 2,2-bis(5-(p-tolyl)penta-2,4-diyn-1-yl)malonate

Yellow solid, 3.40 g (78% yield); m.p. 102-103°C; <sup>1</sup>H NMR (300 MHz, CDCl<sub>3</sub>): δ 7.38-7.35 (d, 4H), 7.12-7.10 (d, 4H), 3.80 (s, 6H), 3.20 (s, 4H), 2.34 (s, 6H); <sup>13</sup>C NMR (75.5 MHz, CDCl<sub>3</sub>): δ 168.6, 139.5, 132.5, 129.1, 118.4, 77.5, 76.3, 73.2, 68.6, 56.7, 53.4, 24.2, 21.6 ppm; FT-IR (KBr):  $\bar{\nu}$  3487, 1740, 1508, 1431, 1335, 1287, 1198, 1063, 1049, 816, 529 cm<sup>-1</sup>; HRMS (APCI): m/z [M+H]<sup>+</sup> calcd for C<sub>29</sub>H<sub>24</sub>O<sub>4</sub>: 437.1747; found: 437.1752.

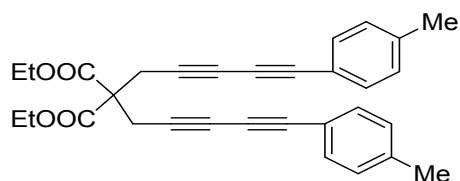

#### Diethyl 2,2-bis(5-(p-tolyl)penta-2,4-diyn-1-yl)malonate

Yellow solid, 3.67 g (79% yield); m.p. 88-89°C; <sup>1</sup>H NMR (300 MHz, CDCl<sub>3</sub>): δ 7.38-7.35 (d, 4H), 7.12-7.10 (d, 4H), 4.30-4.24 (q, J=6 Hz, 4H), 3.19 (s, 4H), 2.35 (s, 6H), 1.31-1.27 (t, J=6 Hz, 6H); <sup>13</sup>C NMR (75.5 MHz, CDCl<sub>3</sub>): δ 168.2, 139.5, 132.5, 132.3, 129.2, 129.1, 118.4, 81.5, 77.5, 76.1, 73.3, 68.5, 62.3, 56.6, 24.1, 21.6, 14.0 ppm; FT-IR (KBr):  $\bar{\nu}$  3466, 1742, 1058, 1423, 1298, 1200, 1072, 808, 525 cm<sup>-1</sup>; HRMS (APCI): m/z [M+H]<sup>+</sup> calcd for C<sub>31</sub>H<sub>28</sub>O<sub>4</sub>: 465.2060; found: 465.2058.

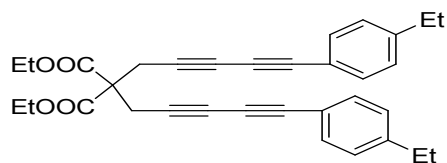

#### Diethyl 2,2-bis(5-(4-ethylphenyl)penta-2,4-diyn-1-yl)malonate

Yellow solid, 3.94 g (80% yield); m.p. 74-75°C; <sup>1</sup>H NMR (300 MHz, CDCl<sub>3</sub>): δ 7.40-7.38 (d, 4H), 7.15-7.12 (d, 4H), 4.30-4.24 (q, J=6 Hz, 4H), 3.19 (s, 4H), 2.68-2.60 (q, J=6 Hz, 4H), 1.32-1.19 (m, 12H); <sup>13</sup>C NMR (75.5 MHz, CDCl<sub>3</sub>): δ 168.2, 145.7, 132.6, 127.9, 118.6, 77.4, 76.1, 73.2, 68.5, 62.4, 56.6, 28.9, 24.1, 15.2, 14.0 ppm; FT-IR (KBr):  $\bar{\nu}$  3462, 1740, 1508, 1300, 1192, 1051, 1016, 829, 538 cm<sup>-1</sup>; HRMS (APCI): m/z [M+H]<sup>+</sup> calcd for C<sub>33</sub>H<sub>32</sub>O<sub>4</sub>: 493.2373; found: 493.2374.

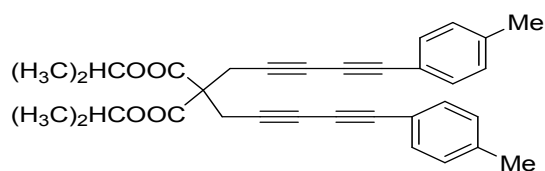

### Diisopropyl 2,2-bis(5-(p-tolyl)penta-2,4-diyn-1-yl)malonate

Yellow solid, 3.64 g (74% yield); m.p. 91-92°C; <sup>1</sup>H NMR (300 MHz, CDCl<sub>3</sub>): δ 7.37-7.34 (m, 4H), 7.11-7.09 (m, 4H), 5.14-5.10 (m, 2H), 3.16 (s, 4H), 2.34 (s, 6H), 1.28-1.26(d, J=6 Hz, 12H); <sup>13</sup>C NMR (75.5 MHz, CDCl<sub>3</sub>): δ 167.8, 139.4, 132.5, 132.3, 129.2, 129.1, 118.5, 77.6, 76.0, 73.3, 69.9, 68.4, 56.5, 24.0 21.6, 21.5 ppm; FT-IR (KBr):  $\bar{\nu}$  3466, 1734, 1508, 1298, 1211, 1196, 1105, 1064, 818, 528 cm<sup>-1</sup>; HRMS (APCI): m/z [M+H]<sup>+</sup> calcd for C<sub>33</sub>H<sub>32</sub>O<sub>4</sub>: 493.2373; found: 493.2378.

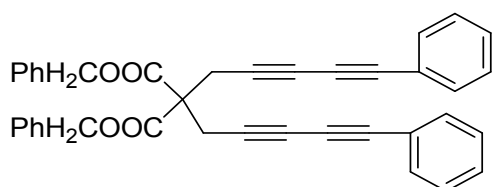

### Dibenzyl 2,2-bis(5-phenylpenta-2,4-diyn-1-yl)malonate

Yellow solid, 4.09 g (73% yield); m.p. 79-80°C; <sup>1</sup>H NMR (300 MHz, CDCl<sub>3</sub>): δ 7.49-7.25 (m, 20H), 5.18 (s, 4H), 3.24 (s, 4H); <sup>13</sup>C NMR (75.5 MHz, CDCl<sub>3</sub>): δ 167.9, 134.9, 132.6, 129.1, 128.6, 128.4, 128.4, 128.2, 128.0, 121.6, 77.6, 76.0, 73.9, 68.7, 68.0, 56.9, 24.2 ppm; FT-IR (KBr):  $\bar{\nu}$  3449, 1734, 1489, 1281, 1202, 1173, 1051, 759, 694, 527 cm<sup>-1</sup>; HRMS (APCI): m/z [M+H]<sup>+</sup> calcd for C<sub>39</sub>H<sub>28</sub>O<sub>4</sub>: 561.2060; found: 561.2058.

## 3. Characterization Data for the New Compounds

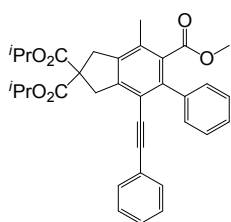

### 2,2-Diisopropyl 5-methyl 4-methyl-6-phenyl-7-(phenylethynyl)-1H-indene-2,2,5(3H)-tricarboxylate (3a)

Colorless solid; (431 mg, 80% yield); m. p. 128.6°C; TLC (petroleum ether/EtOAc = 30:1): R<sub>f</sub> = 0.50.

<sup>1</sup>H NMR (300 MHz, CDCl<sub>3</sub>): δ 7.40-7.19 (m, 10H), 5.15-5.06 (m, 2H), 3.81 (s, 2H), 3.61 (s, 2H), 3.50 (s, 3H), 2.30 (s, 3H), 1.33-1.25 (m, 12H).

<sup>13</sup>C NMR (125 MHz, CDCl<sub>3</sub>): δ 171.4, 170.1, 144.0, 141.6, 139.3, 139.1, 136.2, 133.9, 131.7, 131.2, 129.8, 128.5, 128.0, 127.8, 123.6, 117.4, 96.4, 86.9, 77.6, 77.4, 77.1, 69.8, 59.6, 52.1, 41.4, 40.3, 21.9, 17.1 ppm.

FT-IR (KBr)  $\bar{\nu}$  2978, 2924, 1745, 1732, 1714, 1490, 1446, 1373, 1271, 1255, 1234, 1192, 1161, 1105, 1039, 763, 694cm<sup>-1</sup>.

HRMS (APCI): m/z calcd for C<sub>34</sub>H<sub>34</sub>O<sub>6</sub> [M+H]<sup>+</sup>, 539.2428, found 539.2432.

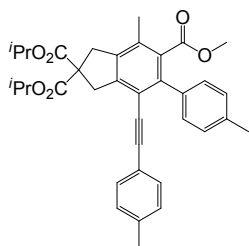

**2,2-Diisopropyl 5-methyl 4-methyl-6-(p-tolyl)-7-(p-tolylolethynyl)-1H-indene-2,2,5(3H)-tricarboxylate (3b)**

**Colorless** solid; (471 mg, 83% yield); m. p. 162.7°C; TLC (petroleum ether/EtOAc = 30:1):  $R_f$  = 0.52.

**$^1\text{H NMR}$**  (300 MHz,  $\text{CDCl}_3$ ):  $\delta$  7.29-7.05 (m, 8H), 5.12-5.04 (m, 2H), 3.78 (s, 2H), 3.58 (s, 2H), 3.52 (s, 3H), 2.39 (s, 3H), 2.32 (s, 3H), 2.27 (s, 3H) 1.28-1.26 (m, 12H).

**$^{13}\text{C NMR}$**  (125 MHz,  $\text{CDCl}_3$ ):  $\delta$  171.4, 170.3, 143.9, 141.3, 138.8, 138.6, 137.3, 136.3, 134.0, 131.6, 130.8, 129.7, 129.3, 128.7, 120.6, 117.6, 96.5, 86.4, 77.6, 77.4, 77.1, 69.8, 59.5, 52.1, 41.4, 40.3, 21.9, 21.9, 21.7 ppm.

**FT-IR** (KBr):  $\bar{\nu}$  2980, 2360, 1734, 1510, 1433, 1354, 1271, 1253, 1234, 1180, 1166, 1109, 1099, 1056, 819, 528  $\text{cm}^{-1}$ .

**HRMS** (APCI):  $m/z$  calcd for  $\text{C}_{36}\text{H}_{38}\text{O}_6$   $[\text{M}+\text{H}]^+$ , 567.2741, found 567.2740.

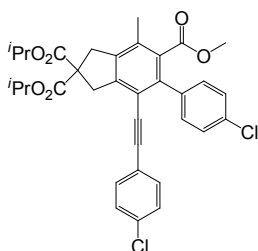

**2,2-Diisopropyl 5-methyl 6-(4-chlorophenyl)-7-((4-chlorophenyl)ethynyl)-4-methyl-1H-indene-2,2,5(3H)-tricarboxylate (3c)**

**Colorless** solid; (473 mg, 78% yield); m. p. 137.5°C; TLC (petroleum ether/EtOAc = 30:1):  $R_f$  = 0.47;

**$^1\text{H NMR}$**  (300 MHz,  $\text{CDCl}_3$ ):  $\delta$  7.38-7.10 (m, 8H), 5.12-5.04 (m, 2H), 3.75 (s, 2H), 3.59 (s, 2H), 3.52 (s, 3H), 2.27 (s, 3H), 1.27 (d,  $J$  = 6 Hz, 12H).

**$^{13}\text{C NMR}$**  (125 MHz,  $\text{CDCl}_3$ ):  $\delta$  170.7, 169.2, 143.6, 139.6, 139.0, 137.1, 134.1, 133.4, 132.3, 131.0, 130.7, 128.4, 127.7, 121.2, 116.4, 104.8, 95.0, 86.9, 77.1, 76.8, 76.5, 69.3, 58.9, 51.8, 40.7, 39.7, 21.3, 16.6 ppm.

**FT-IR** (KBr):  $\bar{\nu}$  2981, 1730, 1490, 1276, 1249, 1165, 1101, 825  $\text{cm}^{-1}$ .

**HRMS** (APCI):  $m/z$  calcd for  $\text{C}_{34}\text{H}_{32}\text{Cl}_2\text{O}_6$   $[\text{M}+\text{H}]^+$ , 607.1649, found 607.1645.

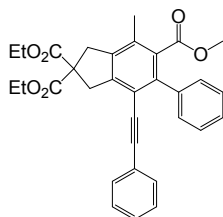

**2,2-Diethyl 5-methyl 4-methyl-6-phenyl-7-(phenylethynyl)-1H-indene-2,2,5(3H)-tricarboxylate (3d)**

**Colorless** solid; (409 mg, 80% yield); m. p. 131.3°C; TLC (petroleum ether/EtOAc = 20:1):  $R_f$  = 0.45.



**<sup>1</sup>H NMR** (300 MHz, CDCl<sub>3</sub>): δ 7.38-7.18 (m, 10H), 4.25 (q, *J* = 6 Hz, 4H), 3.83 (s, 2H), 3.63 (s, 2H), 3.48 (s, 3H), 2.29 (s, 3H), 1.25 (t, *J* = 7.5 Hz, 6H).

**<sup>13</sup>C NMR** (125 MHz, CDCl<sub>3</sub>): δ 143.4, 141.1, 138.8, 138.6, 133.5, 131.3, 130.8, 129.4, 128.1, 127.6, 127.5, 123.1, 117.0, 96.0, 86.4, 77.2, 77.0, 76.7, 62.0, 59.1, 51.8, 41.0, 39.9, 16.8, 14.0 ppm.

**FT-IR** (KBr):  $\bar{\nu}$  2981, 1728, 1490, 1442, 1271, 1257, 123, 1166, 1076, 759, 692 cm<sup>-1</sup>.

**HRMS** (APCI): *m/z* calcd for C<sub>32</sub>H<sub>30</sub>O<sub>6</sub>[M+H]<sup>+</sup>, 511.2115, found 511.2111.

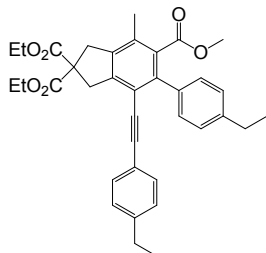

**2,2-Diethyl 5-methyl 6-(4-ethylphenyl)-7-((4-ethylphenyl)ethynyl)-4-methyl-1H-indene-2,2,5(3H)-tricarboxylate (3e)**

Colorless solid; (481 mg, 85% yield); m. p. 98.6°C; TLC (petroleum ether/EtOAc = 20:1): R<sub>f</sub> = 0.50.

**<sup>1</sup>H NMR** (300 MHz, CDCl<sub>3</sub>): δ 7.31-7.06 (m, 8H), 4.26 (q, *J* = 7 Hz, 4H), 3.81 (s, 2H), 3.62 (s, 2H), 3.50 (s, 3H), 2.65 (ddd, *J* = 6 Hz, 15 Hz, 27 Hz, 4H), 2.27 (s, 3H), 1.31-1.17 (m, 12H).

**<sup>13</sup>C NMR** (125 MHz, CDCl<sub>3</sub>): δ 171.5, 169.9, 144.6, 143.3, 143.2, 141.1, 138.3, 136.1, 133.6, 131.3, 130.4, 129.3, 127.7, 127.1, 120.4, 117.3, 102.7, 102.4, 96.2, 86.0, 77.2, 77.0, 76.7, 61.9, 59.1, 51.8, 41.0, 39.9, 30.9, 28.8, 28.7, 16.7, 15.7, 15.4, 14.0 ppm.

**FT-IR** (KBr):  $\bar{\nu}$  2964, 1722, 1512, 1433, 1273, 1251, 1234, 1182, 1166, 1055, 833 cm<sup>-1</sup>.

**HRMS** (APCI): *m/z* calcd for C<sub>36</sub>H<sub>38</sub>O<sub>6</sub>[M+H]<sup>+</sup>, 567.2741, found 567.2742.

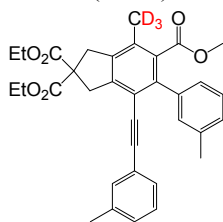

**2,2-Diethyl 5-methyl 4-methyl-6-(m-tolyl)-7-(m-tolylolethynyl)-1H-indene-2,2,5(3H)-tricarboxylate (3f)**

Colorless solid; (433 mg, 80% yield); m. p. 65°C; TLC (petroleum ether/EtOAc = 20:1): R<sub>f</sub> = 0.48;

**<sup>1</sup>H NMR** (300 MHz, CDCl<sub>3</sub>): δ 7.28-7.03 (m, 8H), 4.27-4.22 (m, 4H), 3.83 (s, 2H), 3.63 (s, 2H), 3.51 (s, 3H), 2.39 (s, 3H), 2.29 (s, 3H), 1.29 (t, *J* = 7.5 Hz, 6H).

**<sup>13</sup>C NMR** (125 MHz, CDCl<sub>3</sub>): δ 171.9, 170.2, 143.8, 141.6, 139.1, 138.8, 138.2, 137.3, 134.0, 132.3, 131.0, 130.5, 129.4, 128.7, 128.6, 128.4, 127.9, 126.8, 123.4, 117.4, 113.2, 96.7, 86.7, 77.6, 77.4, 77.1, 62.3, 59.5, 52.1, 41.5, 40.4, 21.8, 21.5, 14.4 ppm.

**FT-IR** (KBr):  $\bar{\nu}$  2978, 2949, 2918, 1734, 1722, 1602, 1581, 1487, 1431, 1365, 1269, 1201, 1184, 1072, 858, 792, 692 cm<sup>-1</sup>.

**HRMS** (APCI): *m/z* calcd for C<sub>34</sub>H<sub>31</sub>D<sub>3</sub>O<sub>6</sub>[M+H]<sup>+</sup>, 542.2616, found 542.2613.

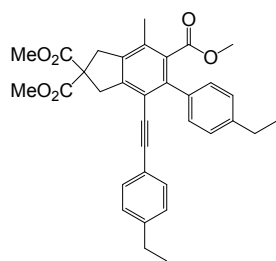

**Trimethyl 6-(4-ethylphenyl)-7-((4-ethylphenyl)ethynyl)-4-methyl-1H-indene-2,2,5(3H)-tricarboxylate (3g)**

Colorless solid; (436 mg, 81% yield); m. p. 142.9°C; TLC (petroleum ether/EtOAc = 10:1):  $R_f$  = 0.26.

$^1\text{H NMR}$  (300 MHz,  $\text{CDCl}_3$ ):  $\delta$  7.31-7.10 (m, 8H), 3.83-3.77 (m, 4H), 3.64 (s, 2H), 3.51 (s, 3H), 2.72- 2.61 (m, 4H), 2.28 (s, 3H), 1.31-1.19 (m, 6H).

$^{13}\text{C NMR}$  (125 MHz,  $\text{CDCl}_3$ ):  $\delta$  172.3, 170.2, 145.0, 143.8, 143.5, 141.6, 138.6, 136.5, 134.1, 131.7, 130.8, 129.8, 128.1, 127.5, 120.8, 117.8, 96.7, 86.4, 77.6, 77.4, 77.1, 59.5, 53.5, 52.2, 41.6, 40.5, 29.2, 29.1, 17.1, 16.1, 15.7 ppm.

**FT-IR** (KBr):  $\bar{\nu}$  2956, 1753, 1732, 1508, 1436, 1232, 1193, 1163, 1056, 837  $\text{cm}^{-1}$ .

**HRMS** (APCI):  $m/z$  calcd for  $\text{C}_{34}\text{H}_{34}\text{O}_6[\text{M}+\text{H}]^+$ , 539.2428, found 539.2427.

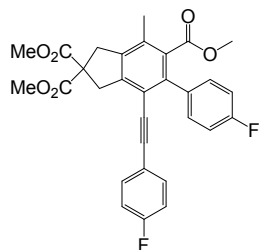

**Trimethyl 6-(4-fluorophenyl)-7-((4-fluorophenyl)ethynyl)-4-methyl-1H-indene-2,2,5(3H)-tricarboxylate (3h)**

Colorless solid; (389 mg, 75% yield); m. p. 159.3°C; TLC (petroleum ether/EtOAc = 10:1):  $R_f$  = 0.19.

$^1\text{H NMR}$  (300 MHz,  $\text{CDCl}_3$ ):  $\delta$  7.37-7.16 (m, 4H), 7.12-6.94 (m, 4H), 3.80 (s, 8H), 3.64 (s, 2H), 3.52 (s, 3H), 2.27 (s, 3H).

$^{13}\text{C NMR}$  (125 MHz,  $\text{CDCl}_3$ ):  $\delta$  172.2, 169.9, 162.8(d, 1JFC = 271 Hz), 143.7, 140.3, 139.1, 135.1(d, 4JFC = 3.75 Hz), 134.2, 133.6(d, 3JFC = 8 Hz), 131.6(d, 3JFC = 8 Hz), 131.3, 119.4(d, 4JFC = 2 Hz), 117.4, 116.0(d, 2JFC = 21 Hz), 115.0(d, 2JFC = 21 Hz), 95.6, 86.2, 77.6, 77.4, 77.1, 59.4, 53.6, 52.3, 41.5, 40.4, 17.2 ppm.

**FT-IR** (KBr):  $\bar{\nu}$  2954, 1734, 1697, 1598, 1506, 1433, 1284, 1247, 1226, 1201, 1157, 530  $\text{cm}^{-1}$ .

**HRMS** (APCI):  $m/z$  calcd for  $\text{C}_{30}\text{H}_{24}\text{F}_2\text{O}_6[\text{M}+\text{H}]^+$ , 519.1614, found 519.1615.

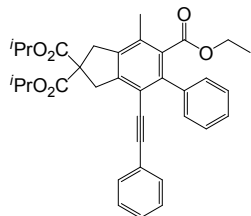

**5-Ethyl 2,2-diisopropyl 4-methyl-6-phenyl-7-(phenylethynyl)-1H-indene-2,2,5(3H)-tricarboxylate (3i)**

Colorless solid; (436 mg, 79% yield); m. p. 121.4°C; TLC (petroleum ether/EtOAc = 30:1),  $R_f$  = 0.51;

**<sup>1</sup>H NMR** (300 MHz, CDCl<sub>3</sub>): δ 7.38-7.19 (m, 10H), 5.13-5.05 (m, 2H), 3.96 (dd, *J*=9, 15 Hz, 2H), 3.79 (s, 2H), 3.60 (s, 2H), 2.30 (s, 3H), 1.28 (d, *J* = 6 Hz, 12H), 0.89 (t, *J* = 7.5 Hz, 3H).

**<sup>13</sup>C NMR** (125 MHz, CDCl<sub>3</sub>): δ 171.0, 169.1, 143.4, 141.2, 139.0, 138.7, 133.7, 131.3, 130.8, 129.6, 128.1, 128.1, 127.5, 127.4, 123.3, 117.0, 95.9, 86.5, 77.2, 77.0, 76.7, 69.4, 60.9, 59.2, 41.0, 40.0, 21.5, 16.7, 13.5 ppm.

**FT-IR** (KBr):  $\bar{\nu}$  2986, 1718, 1523, 1245, 1143, 1123, 834, 517 cm<sup>-1</sup>.

**HRMS** (APCI): *m/z* calcd for C<sub>35</sub>H<sub>36</sub>O<sub>6</sub>[M+H]<sup>+</sup>, 553.2585, found 553.2579.

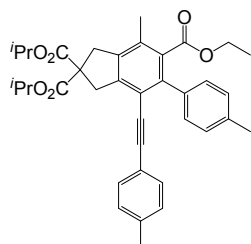

**5-Ethyl 2,2-diisopropyl 4-methyl-6-(p-tolyl)-7-(p-tolylethynyl)-1H-indene-2,2,5(3H)-tricarboxylate (3j)**

**Colorless** solid; (482 mg, 81% yield); m. p. 161.5°C; TLC (petroleum ether/EtOAc = 30:1): R<sub>f</sub> = 0.51.

**<sup>1</sup>H NMR** (300 MHz, CDCl<sub>3</sub>): δ 7.28 (d, *J* = 9 Hz, 2H), 7.17 (d, *J* = 6 Hz, 2H), 7.08 (dd, *J* = 9, 15 Hz, 4H), 5.12-5.04 (m, 2H), 3.98 (dd, *J* = 7.5, 13.5 Hz, 2H), 3.77 (s, 2H), 3.58 (s, 2H), 2.38 (s, 3H), 2.32 (s, 3H), 2.28 (s, 3H), 1.27 (d, *J* = 6 Hz, 12H), 0.94 (t, *J* = 7.5 Hz, 3H).

**<sup>13</sup>C NMR** (125 MHz, CDCl<sub>3</sub>): δ 171.0, 169.3, 143.3, 141.0, 138.4, 138.2, 136.9, 136.0, 133.7, 131.2, 130.4, 129.4, 128.9, 128.2, 120.3, 117.2, 96.1, 86.0, 77.2, 77.0, 76.7, 69.3, 60.9, 59.1, 41.0, 39.9, 21.5, 21.4, 21.3, 16.7, 13.6 ppm.

**FT-IR** (KBr):  $\bar{\nu}$  2981, 1728, 1510, 1255, 1180, 1101, 817, 526 cm<sup>-1</sup>.

**HRMS** (APCI): *m/z* calcd for C<sub>37</sub>H<sub>40</sub>O<sub>6</sub>[M+H]<sup>+</sup>, 581.2898, found 581.2891.

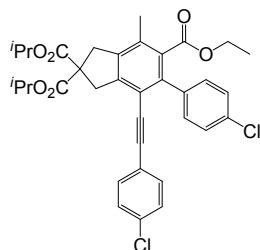

**5-Ethyl 2,2-diisopropyl 6-(4-chlorophenyl)-7-((4-chlorophenyl)ethynyl)-4-methyl-1H-indene-2,2,5(3H)-tricarboxylate (3k)**

**Colorless** solid; (471 mg, 76% yield); m. p. 108.1°C; TLC (petroleum ether/EtOAc = 30:1), R<sub>f</sub> = 0.45.

**<sup>1</sup>H NMR** (300 MHz, CDCl<sub>3</sub>): δ 7.34 (dd, *J* = 9, 15 Hz, 4H), 7.15 (d, *J* = 9 Hz, 2H), 7.11 (d, *J* = 6 Hz, 2H), 5.13-5.04 (m, 2H), 4.00 (q, *J* = 7 Hz, 2H), 3.76 (s, 2H), 3.59 (s, 2H), 2.29 (s, 3H), 1.28 (d, *J* = 6 Hz, 12H), 0.97 (t, *J* = 7.5 Hz, 3H).

**<sup>13</sup>C NMR** (125 MHz, CDCl<sub>3</sub>): δ 170.9, 168.8, 143.6, 139.8, 139.2, 137.4, 134.3, 133.6, 133.5, 132.5, 131.2, 131.0, 128.6, 127.8, 121.5, 116.8, 95.1, 92.9, 87.1, 85.4, 77.2, 77.0, 76.7, 69.5, 61.1, 59.1, 48.6, 40.9, 39.9, 29.7, 21.5, 16.7, 13.6 ppm.

**FT-IR** (KBr):  $\bar{\nu}$  2966, 2931, 1732, 1512, 1367, 1269, 1253, 1236, 1184, 1174, 1161, 1076, 829 cm<sup>-1</sup>.

**HRMS** (APCI):  $m/z$  calcd for  $C_{35}H_{34}Cl_2O_6$   $[M+H]^+$ , 621.1805, found 621.1800.

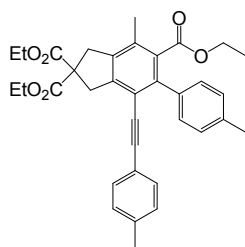

**Triethyl 4-methyl-6-(p-tolyl)-7-(p-tolylolethynyl)-1H-indene-2,2,5(3H)-tricarboxylate (3l)**

**Colorless** solid; (430 mg, 78% yield); m. p. 112.8°C; TLC (petroleum ether/EtOAc = 20:1):  $R_f$  = 0.48.

**$^1H$  NMR** (300 MHz,  $CDCl_3$ ):  $\delta$  7.23 (dd,  $J$  = 9, 30 Hz, 4H), 7.08 (dd,  $J$  = 9, 15 Hz, 4H), 4.25 (dd,  $J$  = 6, 15 Hz, 4H), 3.99 (dd,  $J$  = 6, 15 Hz, 2H), 3.81 (s, 2H), 3.61 (s, 2H), 2.38 (s, 3H), 2.32 (s, 3H), 2.28 (s, 3H), 1.29 (t,  $J$  = 7.5 Hz, 6H), 0.93 (t,  $J$  = 6 Hz, 3H).

**$^{13}C$  NMR** (125 MHz,  $CDCl_3$ ):  $\delta$  171.5, 169.3, 143.2, 141.0, 138.3, 138.2, 136.9, 135.9, 133.8, 131.2, 130.4, 129.4, 128.9, 128.2, 120.2, 117.3, 105.1, 96.1, 86.0, 77.2, 77.0, 76.7, 61.9, 60.9, 59.1, 41.1, 40.0, 30.9, 21.5, 21.3, 16.7, 14.0, 13.6 ppm.

**FT-IR** (KBr):  $\bar{\nu}$  2966, 2360, 1728, 1606, 1510, 1460, 1427, 1365, 1253, 1244, 1298, 1188, 1153, 1095, 1066, 846, 549  $cm^{-1}$ .

**HRMS** (APCI):  $m/z$  calcd for  $C_{35}H_{36}O_6$   $[M+H]^+$ , 553.2585, found 553.2582.

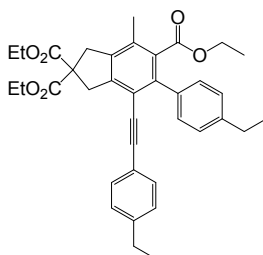

**Triethyl 6-(4-ethylphenyl)-7-((4-ethylphenyl)ethynyl)-4-methyl-1H-indene-2,2,5(3H)-tricarboxylate (3m)**

**Colorless** solid; (475 mg, 82% yield); m. p. 97.7°C; TLC (petroleum ether/EtOAc = 20:1):  $R_f$  = 0.51;

**$^1H$  NMR** (300 MHz,  $CDCl_3$ ):  $\delta$  7.25 (dd,  $J$  = 9, 27 Hz, 4H), 7.15-7.02 (m, 4H), 4.29-4.20 (m, 4H), 4.01-3.93 (m, 2H), 3.81 (s, 2H), 3.62 (s, 2H), 2.73-2.57 (m, 4H), 2.29 (s, 3H), 1.32-1.17 (m, 12H), 0.91-0.85 (m, 3H).

**$^{13}C$  NMR** (125 MHz,  $CDCl_3$ ):  $\delta$  171.5, 169.3, 144.5, 143.4, 143.1, 141.2, 138.3, 136.2, 133.7, 131.3, 130.4, 129.5, 127.7, 127.0, 120.4, 117.3, 96.2, 86.1, 77.2, 77.0, 76.7, 61.9, 60.9, 59.1, 41.0, 40.0, 28.8, 28.7, 19.2, 16.7, 15.9, 15.4, 14.0, 13.5 ppm.

**FT-IR** (KBr):  $\bar{\nu}$  2966, 2931, 1732, 1512, 1367, 1269, 1253, 1236, 1184, 1174, 1161, 1076, 829  $cm^{-1}$ .

**HRMS** (APCI):  $m/z$  calcd for  $C_{37}H_{40}O_6$   $[M+H]^+$ , 581.2898, found 581.2893.

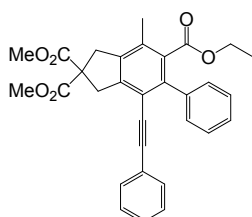

### 5-Ethyl 2,2-dimethyl 4-methyl-6-phenyl-7-(phenylethynyl)-1H-indene-2,2,5(3H)-tricarboxylate (3n)

Colorless solid; (381 mg, 74% yield); m. p. 127.9°C; TLC (petroleum ether/EtOAc = 10:1):  $R_f$  = 0.20.

$^1\text{H NMR}$  (300 MHz,  $\text{CDCl}_3$ ):  $\delta$  7.39-7.20 (m, 10H), 3.97 (q,  $J$  = 6 Hz, 2H), 3.84-3.65 (m, 10H), 2.31 (s, 3H), 0.89 (t,  $J$  = 6 Hz, 3H).

$^{13}\text{C NMR}$  (125 MHz,  $\text{CDCl}_3$ ):  $\delta$  171.9, 169.1, 143.2, 141.2, 138.9, 138.5, 133.8, 131.3, 130.8, 129.6, 128.2, 127.6, 127.5, 123.1, 117.1, 96.1, 86.4, 77.2, 77.0, 76.7, 60.9, 59.1, 5.2, 41.2, 40.1, 16.7, 13.5 ppm.

**FT-IR** (KBr):  $\bar{\nu}$  2978, 1735, 1708, 1440, 1286, 1249, 1176, 1155, 756, 700, 690  $\text{cm}^{-1}$ .

**HRMS** (APCI):  $m/z$  calcd for  $\text{C}_{31}\text{H}_{28}\text{O}_6[\text{M}+\text{H}]^+$ , 497.1959, found 497.1955.

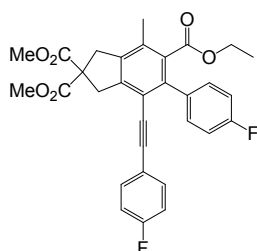

### 5-Ethyl 2,2-dimethyl 6-(4-fluorophenyl)-7-((4-fluorophenyl)ethynyl)-4-methyl-1H-indene-2,2,5(3H)-tricarboxylate (3o)

Colorless solid; (415 mg, 73% yield); m. p. 135.6°C; TLC (petroleum ether/EtOAc = 10:1):  $R_f$  = 0.18.

$^1\text{H NMR}$  (300 MHz,  $\text{CDCl}_3$ ):  $\delta$  7.36 (ddd,  $J$  = 5.7, 8.4, 54 Hz, 4H), 7.03 (dt,  $J$  = 9, 39 Hz, 4H), 4.00 (dd,  $J$  = 9, 15 Hz, 2H), 3.80 (s, 8H), 3.64 (s, 2H), 2.29 (s, 3H), 0.96 (t,  $J$  = 7.5 Hz, 3H).

$^{13}\text{C NMR}$  (125 MHz,  $\text{CDCl}_3$ ):  $\delta$  171.8, 168.9, 163.2(d, 1JFC = 230 Hz), 161.5, 161.3, 143.2, 139.9, 138.7, 134.8(d, 4JFC = 3.75 Hz), 133.9, 133.2(d, 3JFC  $J$  = 8 Hz), 131.3(d, 3JFC = 8 Hz), 130.9, 119.0(d, 4JFC = 2 Hz), 117.0, 115.6(d, 2JFC = 22 Hz), 114.6(d, 2JFC = 21 Hz), 106.1, 95.2, 85.8, 77.2, 77.0, 76.7, 61.0, 59.0, 53.2, 41.1, 40.0, 16.7, 13.7 ppm.

**FT-IR** (KBr):  $\bar{\nu}$  2956, 1751, 1732, 1600, 1508, 1444, 1273, 1234, 1197, 1178, 1157, 1035, 844, 530  $\text{cm}^{-1}$ ;

**HRMS** (APCI):  $m/z$  calcd for  $\text{C}_{31}\text{H}_{26}\text{F}_2\text{O}_6[\text{M}+\text{H}]^+$ , 553.1770, found 553.1769.

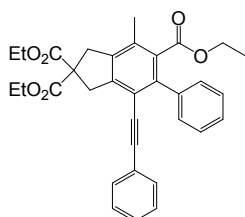

### Triethyl 4-methyl-6-phenyl-7-(phenylethynyl)-1H-indene-2,2,5(3H)-tricarboxylate (3p)

Colorless solid; (403 mg, 77% yield); m. p. 127.4°C; TLC (petroleum ether/EtOAc = 20:1):  $R_f$  = 0.45.

$^1\text{H NMR}$  (300 MHz,  $\text{CDCl}_3$ ):  $\delta$  7.38-7.18 (m, 10H), 4.26 (q,  $J$  = 7 Hz, 4H), 3.96 (q,  $J$  = 6 Hz, 2H), 3.83 (s, 2H), 3.63 (s, 2H), 2.30 (s, 3H), 1.30 (t,  $J$  = 6 Hz, 6H), 0.89 (t,  $J$  = 6 Hz, 3H).

$^{13}\text{C NMR}$  (125 MHz,  $\text{CDCl}_3$ ):  $\delta$  171.5, 169.1, 143.3, 141.2, 138.9, 138.6, 133.7, 131.3, 130.8, 129.6, 128.1, 127.5, 127.4, 123.2, 117.0, 96.0, 86.5, 77.2, 77.0, 76.7, 62.0, 60.9, 59.1, 41.0, 40.0, 16.7, 14.0, 13.5 ppm.

**FT-IR** (KBr):  $\bar{\nu}$  2981, 1728, 1442, 1273, 1255, 1236, 1180, 1159, 758, 698  $\text{cm}^{-1}$ .

**HRMS** (APCI):  $m/z$  calcd for  $\text{C}_{33}\text{H}_{32}\text{O}_6$   $[\text{M}+\text{H}]^+$ , 525.2272, found 525.2269.

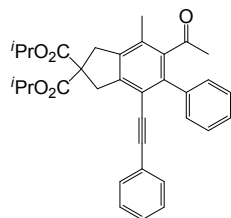

**Diisopropyl 5-acetyl-4-methyl-6-phenyl-7-(phenylethynyl)-1H-indene-2,2(3H)-dicarboxylate (3q)**

**Colorless** solid; (428 mg, 80 % yield); m. p. 143.5°C; TLC (petroleum ether/EtOAc = 20:1):  $R_f$  = 0.40;

**$^1\text{H}$  NMR** (300 MHz,  $\text{CDCl}_3$ ):  $\delta$  7.37-7.33 (m, 2H), 7.20-7.17 (m, 2H), 7.39 (dt,  $J$  = 9, 42 Hz, 4H), 5.14-5.05 (m, 5H), 3.77 (s, 2H), 3.59 (s, 2H), 2.20 (s, 3H), 1.90 (s, 3H), 1.28 (d,  $J$  = 6 Hz, 12H).

**$^{13}\text{C}$  NMR** (125 MHz,  $\text{CDCl}_3$ ):  $\delta$  207.3, 171.5, 143.4, 142.0, 139.6, 139.5, 138.7, 123.6, 117.2, 96.4, 86.9, 69.8, 59.4, 41.4, 40.5, 32.5, 32.2, 22.1, 16.8 ppm.

**FT-IR** (KBr):  $\bar{\nu}$  2980, 1743, 1707, 1697, 1490, 1375, 1273, 1253, 1190, 1103, 761, 692  $\text{cm}^{-1}$ ;

**HRMS** (APCI):  $m/z$  calcd for  $\text{C}_{34}\text{H}_{34}\text{O}_5$   $[\text{M}+\text{H}]^+$  523.2479, found 523.2482.

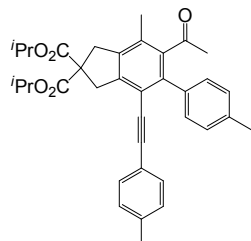

**Diisopropyl 5-acetyl-4-methyl-6-(p-tolyl)-7-(p-tolyethynyl)-1H-indene-2,2(3H)-dicarboxylate (3r)**

**Colorless** solid; (451 mg, 82 % yield); m. p. 120.7°C; TLC (petroleum ether/EtOAc = 20:1):  $R_f$  = 0.42.

**$^1\text{H}$  NMR** (300 MHz,  $\text{CDCl}_3$ ):  $\delta$  7.28-7.18 (m, 4H), 7.10 (q,  $J$  = 9 Hz, 4H), 5.13-5.05 (m, 2H), 3.78 (s, 2H), 3.58 (s, 2H), 2.40 (s, 3H), 2.32 (s, 3H), 2.20 (s, 3H), 1.86 (s, 3H), 1.28 (d,  $J$  = 6, 12H).

**$^{13}\text{C}$  NMR** (125 MHz,  $\text{CDCl}_3$ ):  $\delta$  207.2, 171.1, 142.9, 141.6, 139.1, 138.8, 138.2, 137.5, 136.3, 135.3, 131.2, 130.2, 128.9, 128.6, 125.3, 120.3, 117.0, 96.1, 86.0, 77.2, 77.0, 76.7, 69.4, 59.0, 41.04, 40.10, 32.1, 21.5, 21.5, 21.3, 16.4 ppm.

**FT-IR** (KBr):  $\bar{\nu}$  2980, 1722, 1693, 1510, 1452, 1425, 1375, 1354, 1278, 1271, 1246, 1195, 1107, 1058, 819  $\text{cm}^{-1}$ .

**HRMS** (APCI):  $m/z$  calcd for  $\text{C}_{36}\text{H}_{38}\text{O}_5$   $[\text{M}+\text{H}]^+$  551.2792, found 551.2793.

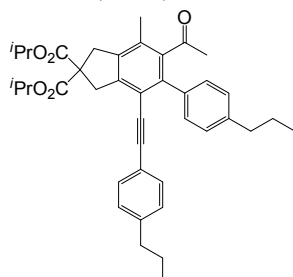

**Diisopropyl 5-acetyl-4-methyl-6-(4-propylphenyl)-7-((4-propylphenyl)ethynyl)-1H-indene-2,2(3H)-dicarboxylate (3s)**

Colorless solid; (527 mg, 87% yield); m. p. 127.8°C; TLC (petroleum ether/EtOAc = 20:1):  $R_f$  = 0.46;

$^1\text{H NMR}$  (300 MHz,  $\text{CDCl}_3$ ):  $\delta$  7.29-7.19 (m, 4H), 7.13-7.04 (m, 4H), 5.11-5.07 (m, 2H), 3.79 (s, 2H), 3.59 (s, 2H), 2.64 (t,  $J$  = 6Hz, 3H), 2.55 (t,  $J$  = 6Hz, 3H), 2.20 (s, 3H), 1.86 (s, 3H), 1.70-1.59 (m, 4H), 1.28 (d,  $J$  = 6Hz, 12H), 0.98-0.89 (m, 6H).

$^{13}\text{C NMR}$  (125 MHz,  $\text{CDCl}_3$ ):  $\delta$  207.1, 171.1, 143.0, 142.8, 142.2, 141.6, 139.4, 138.8, 135.7, 131.2, 130.2, 129.0, 128.3, 128.0, 120.5, 117.1, 96.2, 86.1, 77.2, 77.0, 76.7, 69.4, 59.1, 41.0, 40.1, 37.9, 37.7, 32.0, 24.5, 24.3, 21.5, 16.4, 13.7 ppm.

**FT-IR** (KBr):  $\bar{\nu}$  2956, 1728, 1705, 1508, 1375, 1273, 1247, 1188, 1103, 1060, 813  $\text{cm}^{-1}$ .

**HRMS** (APCI):  $m/z$  calcd for  $\text{C}_{40}\text{H}_{46}\text{O}_5$   $[\text{M}+\text{H}]^+$ , 607.3418, found 607.3425.

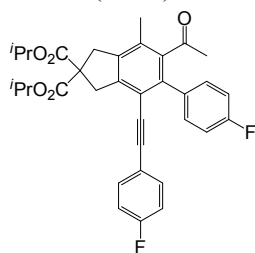**Diisopropyl 5-acetyl-6-(4-fluorophenyl)-7-((4-fluorophenyl)ethynyl)-4-methyl-1H-indene-2,2(3H)-dicarboxylate (3t)**

Colorless solid; (408 mg, 78% yield); m. p. 146.6°C; TLC (petroleum ether/EtOAc = 20:1):  $R_f$  = 0.37;

$^1\text{H NMR}$  (300 MHz,  $\text{CDCl}_3$ ):  $\delta$  7.37-7.32 (m, 2H), 7.21- 7.17 (m, 2H), 7.04 (dt,  $J$  = 9, 42 Hz, 4H), 5.13-5.05 (m, 2H), 3.77 (s, 2H), 3.59 (s, 2H), 2.20 (s, 3H), 1.89 (s, 3H), 1.28 (d, 12H).

$^{13}\text{C NMR}$  (125 MHz,  $\text{CDCl}_3$ ):  $\delta$  207.1, 171.4, 162.8 (d, 1JFC = 246 Hz), 143.4, 142.1, 139.7, 138.3, 134.6 (d, 4JFC = 3 Hz), 133.6 (d, 3JFC = 8 Hz), 132.5 (d, 3JFC = 8 Hz), 129.7, 119.5 (d, 4JFC = 2 Hz), 117.2, 116.0 (d, 2JFC = 21 Hz), 115.4 (d,  $J$  = 21 Hz), 95.5, 86.3, 69.9, 59.4, 41.3, 40.4, 32.5, 21.9, 16.8 ppm.

**FT-IR** (KBr):  $\bar{\nu}$  2981, 1728, 1699, 1598, 1506, 1273, 1247, 1228, 1101, 837  $\text{cm}^{-1}$ .

**HRMS** (APCI):  $m/z$  calcd for  $\text{C}_{34}\text{H}_{32}\text{F}_2\text{O}_5$   $[\text{M}+\text{H}]^+$ , 559.2291, found 559.2285.

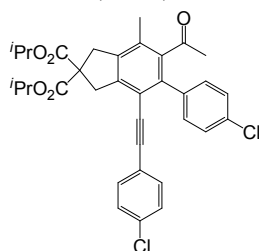**Diisopropyl 5-acetyl-6-(4-chlorophenyl)-7-((4-chlorophenyl)ethynyl)-4-methyl-1H-indene-2,2(3H)-dicarboxylate (3u)**

Yellow solid; (472 mg, 79% yield); m. p. 179.5°C; TLC (petroleum ether/EtOAc = 20:1):  $R_f$  = 0.38.

$^1\text{H NMR}$  (300 MHz,  $\text{CDCl}_3$ ):  $\delta$  7.40-7.24 (m, 8H), 7.13 (d, 2H), 5.13-5.05 (m, 2H), 3.76 (s, 2H), 3.59 (s, 2H), 2.20 (s, 3H), 1.91 (s, 3H), 1.28 (d, 12H).

$^{13}\text{C NMR}$  (125 MHz,  $\text{CDCl}_3$ ):  $\delta$  206.6, 171.0, 143.2, 141.7, 139.6, 137.8, 136.7, 134.4, 134.1, 132.5, 131.7, 129.6, 128.6, 128.2, 121.5, 116.5, 95.2, 87.1, 77.2, 77.0, 76.7, 69.5, 59.0, 40.9, 40.0, 32.3, 21.5, 16.5 ppm.

**FT-IR** (KBr):  $\bar{\nu}$  2988, 1731, 1698, 1489, 1276, 1243, 1099, 824  $\text{cm}^{-1}$ ;

**HRMS** (APCI):  $m/z$  calcd for  $C_{34}H_{32}Cl_2O_5 [M+H]^+$ , 591.1700, found 591.1694.

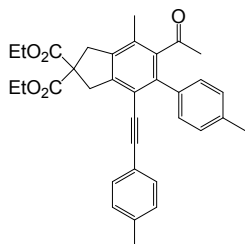

**Diethyl 5-acetyl-4-methyl-6-(p-tolyl)-7-(p-tolylethynyl)-1H-indene-2,2(3H)-dicarboxylate (3v)**

**Colorless** solid; (423 mg, 81% yield); m. p. 148.7°C; TLC (petroleum ether/EtOAc = 20:1):  $R_f$  = 0.36.

**$^1H$  NMR** (300 MHz,  $CDCl_3$ ):  $\delta$  7.29-7.19 (m, 4H), 7.15-7.04 (m, 4H), 4.30-4.20 (m, 4H), 3.82-3.58 (m, 4H), 2.40 (s, 3H), 2.36 (s, 3H), 2.33 (s, 3H), 2.20 (s, 3H), 1.87 (s, 3H), 1.32-1.23 (m, 6H).

**$^{13}C$  NMR** (125 MHz,  $CDCl_3$ ):  $\delta$  207.1, 171.6, 142.8, 141.6, 139.2, 138.7, 138.3, 137.5, 135.3, 131.2, 130.2, 129.0, 128.9, 128.6, 120.2, 117.0, 114.5, 96.1, 85.9, 77.2, 77.0, 76.7, 61.9, 59.0, 41.1, 40.1, 32.1, 21.5, 21.3, 16.4, 14.0 ppm.

**FT-IR** (KBr)  $\bar{\nu}$  2966, 1739, 1724, 1508, 1458, 1444, 1392, 1301, 1244, 1184, 1053, 831, 767, 702  $cm^{-1}$ .

**HRMS** (APCI):  $m/z$  calcd for  $C_{34}H_{34}O_5 [M+H]^+$ , 523.2479, found 523.2475.

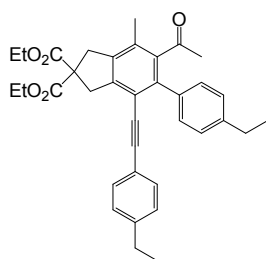

**Diethyl 5-acetyl-6-(4-ethylphenyl)-7-((4-ethylphenyl)ethynyl)-4-methyl-1H-indene-2,2(3H)-dicarboxylate (3w)**

**Colorless** solid; (451 mg, 84% yield); m. p. 165.8°C; TLC (petroleum ether/EtOAc = 20:1):  $R_f$  = 0.38.

**$^1H$  NMR** (300 MHz,  $CDCl_3$ ):  $\delta$  7.29-7.20 (m, 4H), 7.13-7.05 (m, 4H), 4.24 (dd,  $J$  = 6, 9 Hz, 4H), 3.81 (s, 2H), 3.61 (s, 2H), 2.69 (dd,  $J$  = 9, 15 Hz, 2H), 2.60 (dd,  $J$  = 9, 15 Hz, 2H), 2.19 (s, 3H), 1.86 (s, 3H), 1.31-1.16 (m, 12H).

**$^{13}C$  NMR** (125 MHz,  $CDCl_3$ ):  $\delta$  207.6, 172.0, 145.0, 144.3, 143.1, 142.0, 139.7, 139.1, 135.9, 131.7, 130.7, 129.4, 128.1, 127.8, 120.8, 117.5, 86.4, 77.6, 77.4, 77.1, 62.3, 59.4, 41.5, 40.5, 29.2, 29.1, 16.9, 16.1, 15.8, 14.4 ppm.

**FT-IR** (KBr)  $\bar{\nu}$  2978, 1728, 1701, 1508, 1436, 1280, 1267, 1247, 1184, 1155, 1070, 817, 528  $cm^{-1}$ .

**HRMS** (APCI):  $m/z$  calcd for  $C_{36}H_{38}O_5 [M+H]^+$ , 551.2792, found 551.2795.

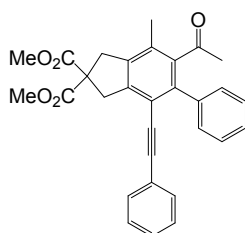

**Dimethyl 5-acetyl-4-methyl-6-phenyl-7-(phenylethynyl)-1H-indene-2,2(3H)-dicarboxylate (3x)**

**Colorless** solid; (361 mg, 81% yield); TLC (petroleum ether/EtOAc = 10:1):  $R_f$  = 0.20.



**<sup>1</sup>H NMR** (300 MHz, CDCl<sub>3</sub>): δ 7.39-7.22 (m, 10H), 3.84 (s, 2H), 3.81 (s, 6H), 3.65 (s, 2H), 2.21 (s, 3H), 1.87 (s, 3H).

**<sup>13</sup>C NMR** (125 MHz, CDCl<sub>3</sub>): δ 207.3, 172.3, 143.1, 142.1, 139.7, 139.2, 138.6, 131.7, 130.7, 129.7, 128.6, 128.3, 123.5, 117.3, 96.5, 86.8, 77.6, 77.4, 77.1, 59.4, 53.6, 41.6, 40.6, 32.5, 16.8 ppm.

**FT-IR** (KBr):  $\bar{\nu}$  2961, 1724, 1686, 1578, 1512, 1437, 1276, 1236, 1148, 845, 521 cm<sup>-1</sup>.

**HRMS** (APCI): *m/z* calcd for C<sub>30</sub>H<sub>26</sub>O<sub>5</sub>[M+H]<sup>+</sup>, 467.1862, found 467.1865.

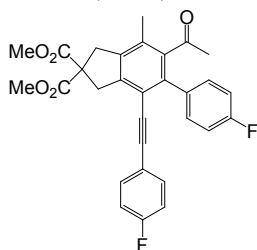

**Dimethyl 5-acetyl-6-(4-fluorophenyl)-7-((4-fluorophenyl)ethynyl)-4-methyl-1H-indene-2,2(3H)-dicarboxylate (3y)**

Colorless solid; (382 mg, 76% yield); m. p. 165.3°C; TLC (petroleum ether/EtOAc = 10:1): R<sub>f</sub> = 0.15.

**<sup>1</sup>H NMR** (300 MHz, CDCl<sub>3</sub>): δ 7.37-7.32 (m, 2H), 7.22-7.17 (m, 2H), 7.11 (t, *J* = 9 Hz, 2H), 6.97 (t, *J* = 9 Hz, 2H), 3.81 (s, 8H), 3.64 (s, 2H), 2.20 (s, 3H), 1.90 (s, 3H).

**<sup>13</sup>C NMR** (125 MHz, CDCl<sub>3</sub>): δ 206.7, 171.9, 162.5(d, 1JFC = 247 Hz), 142.7, 141.8, 139.1, 137.9, 134.1(d, 4JFC = 3 Hz), 133.2(d, 3JFC = 8 Hz), 132.1(d, 3JFC = 8 Hz), 129.4, 119.0(d, 4JFC = 3 Hz), 116.8, 115.6(d, 4JFC = 22 Hz), 115.0(d, 4JFC = 21 Hz), 95.2, 85.8, 58.9, 53.2, 41.1, 40.1, 32.1, 16.4 ppm.

**FT-IR** (KBr):  $\bar{\nu}$  2954, 1734, 1697, 1598, 1506, 1435, 1284, 1226, 1157, 837, 526 cm<sup>-1</sup>.

**HRMS** (APCI): *m/z* calcd for C<sub>30</sub>H<sub>24</sub>F<sub>2</sub>O<sub>5</sub> [M+H]<sup>+</sup>, 503.1665, found 503.1664.

#### 4. X-Ray Structure for 3h and 3y

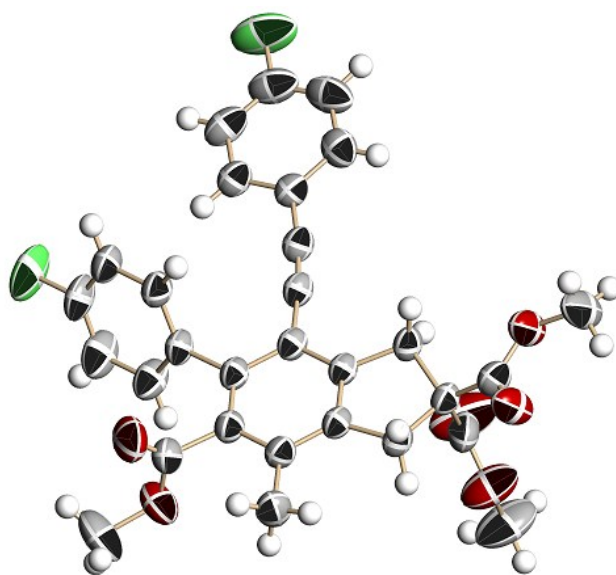

3h

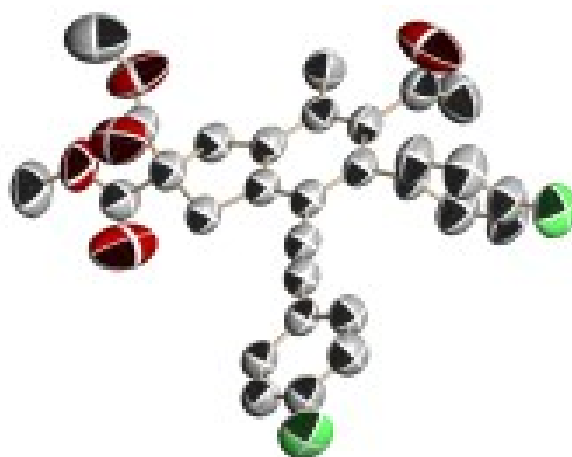

3y

## 5. $^1\text{H}$ NMR & $^{13}\text{C}$ NMR Spectra for New Compounds

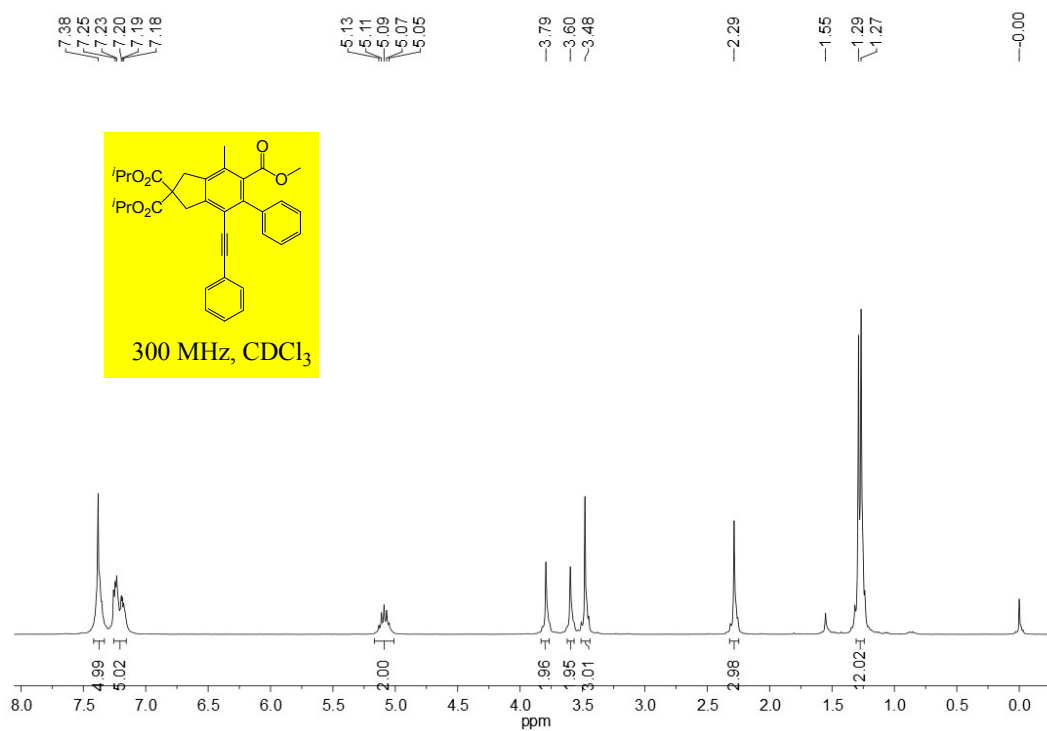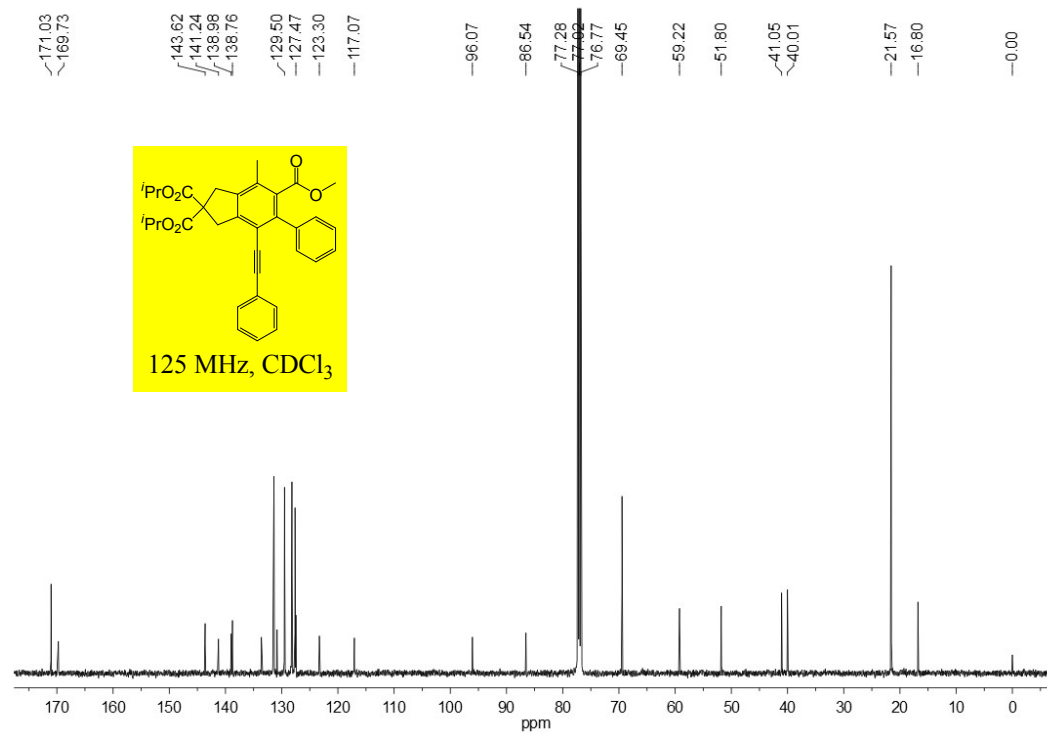

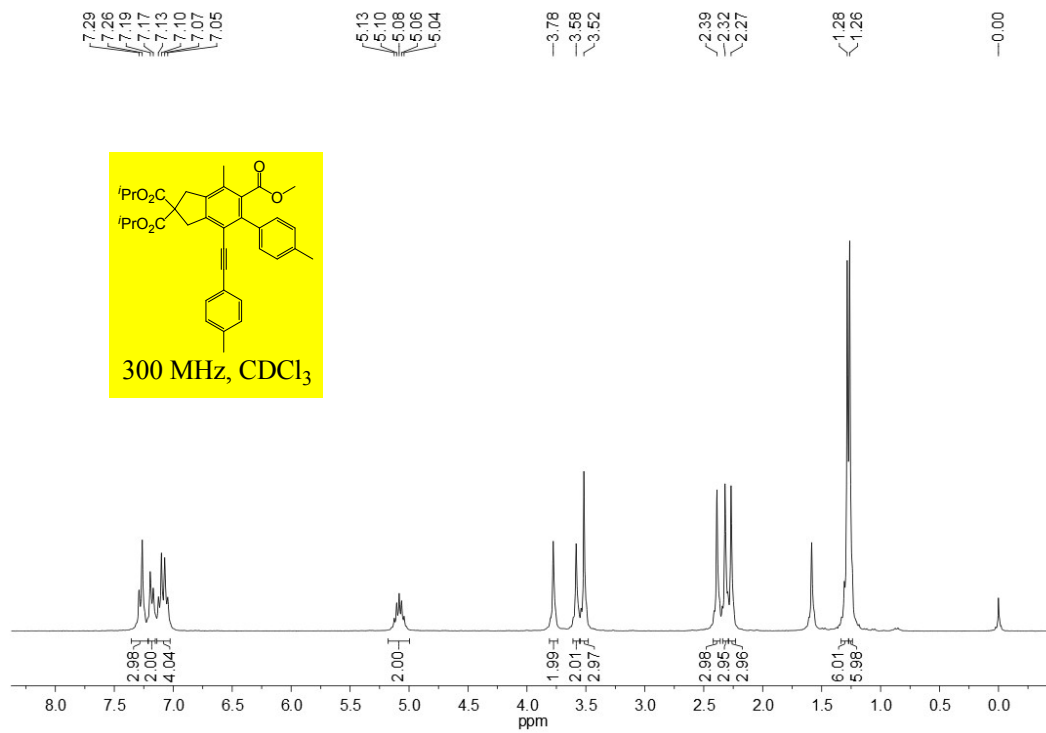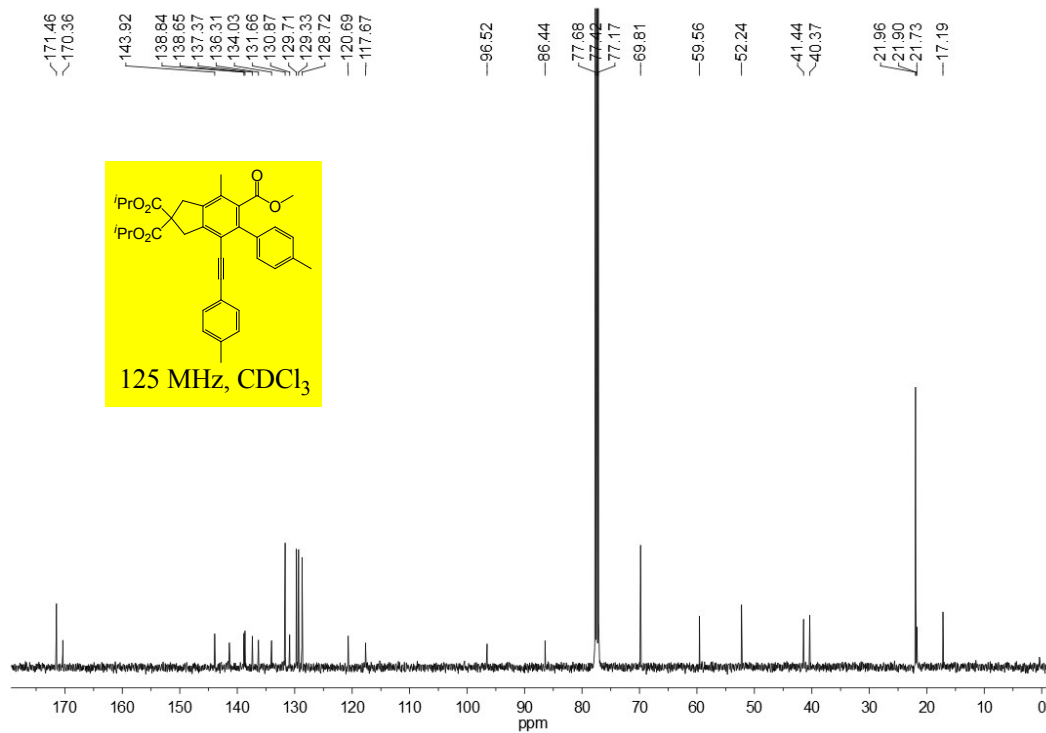

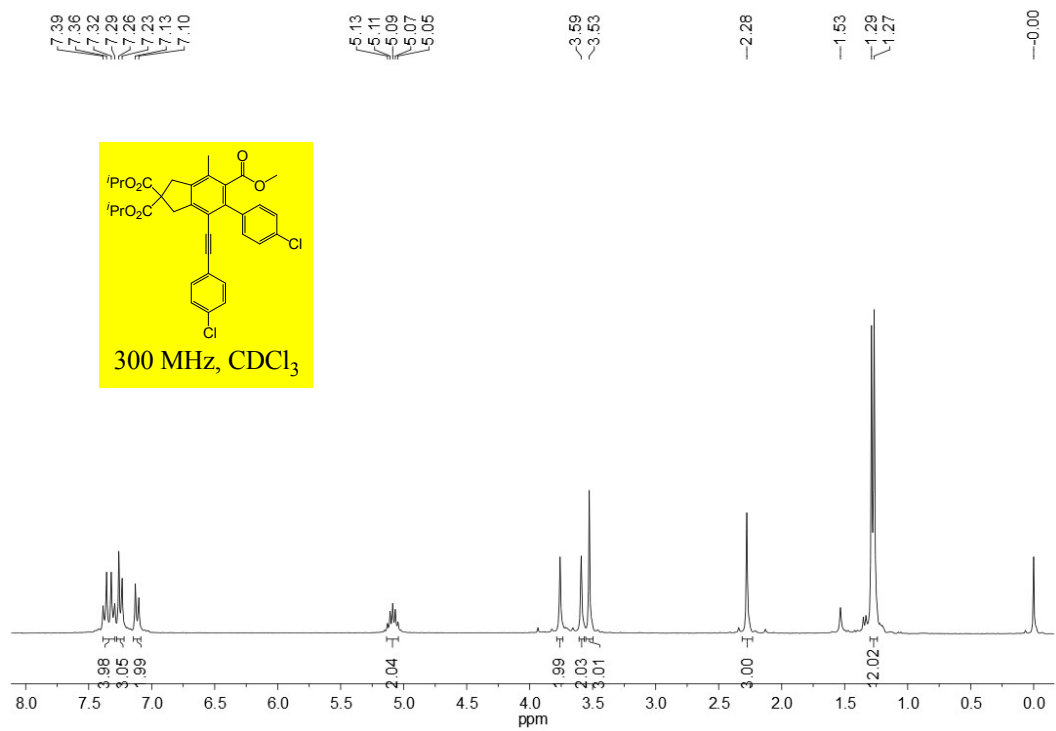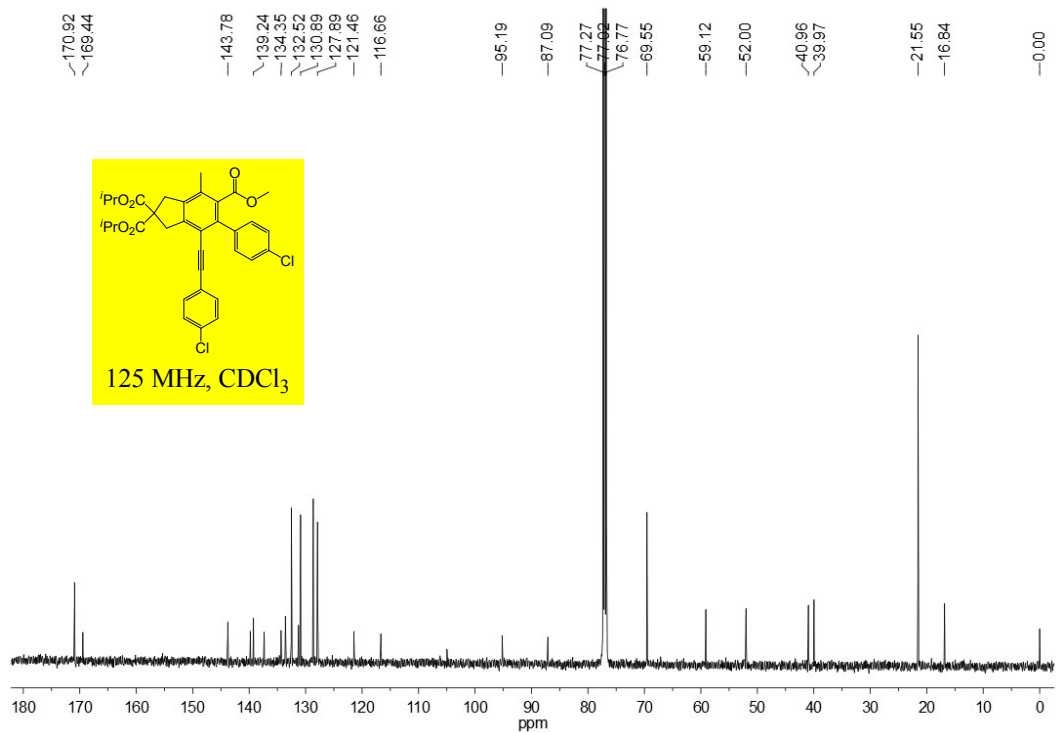

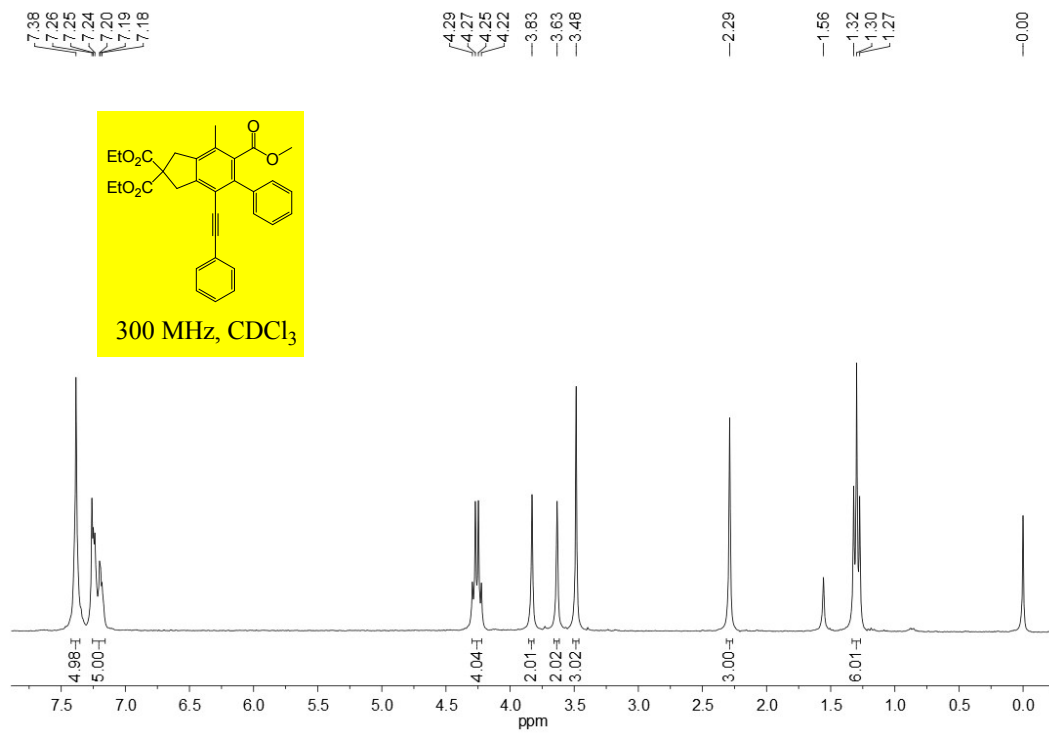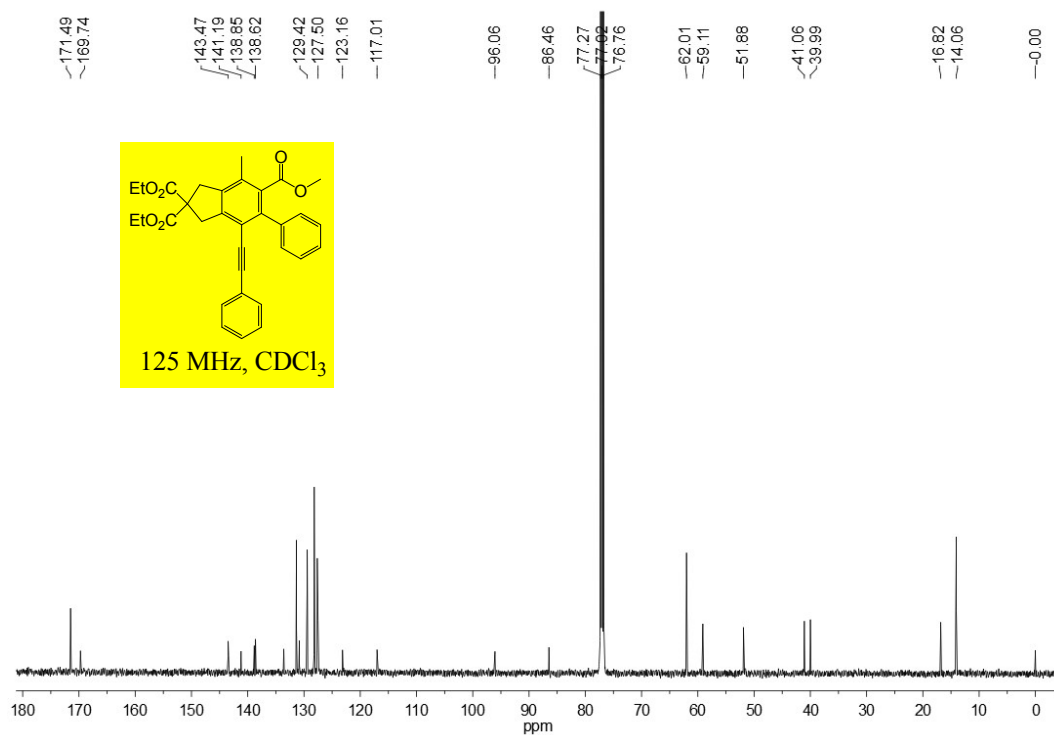

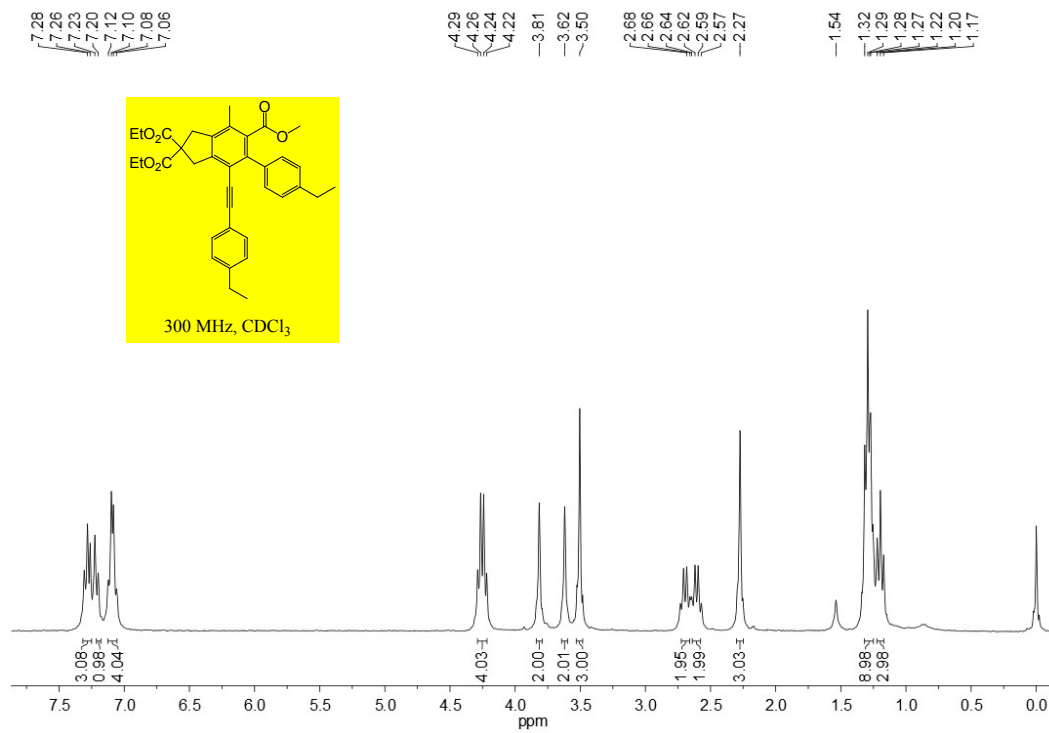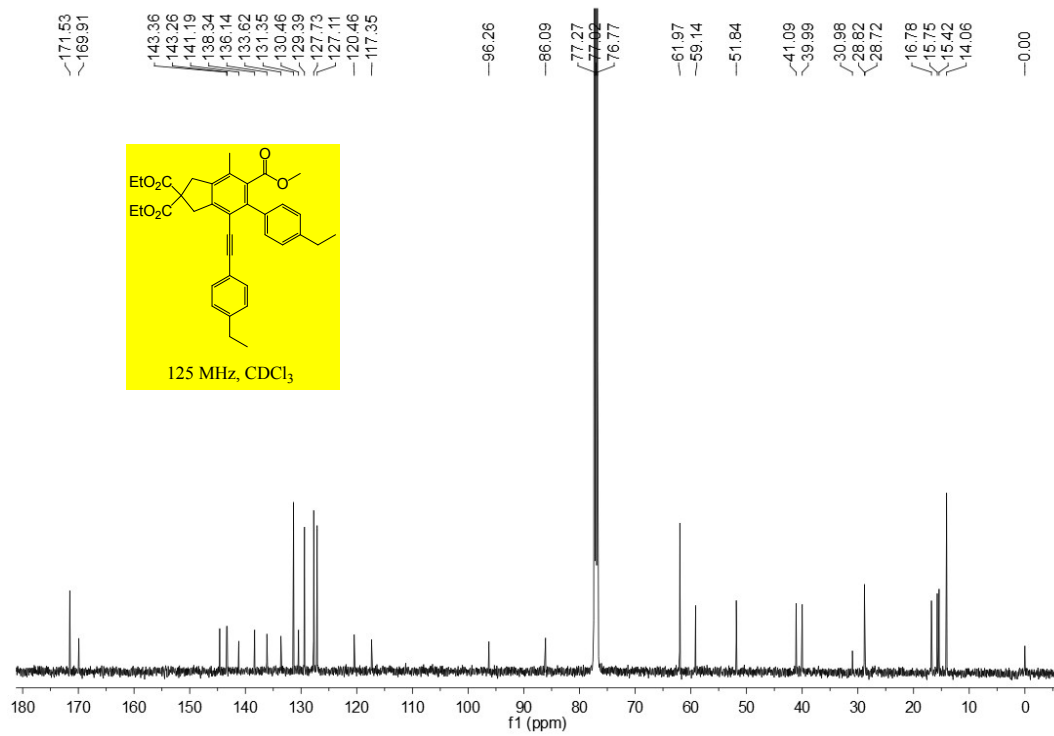

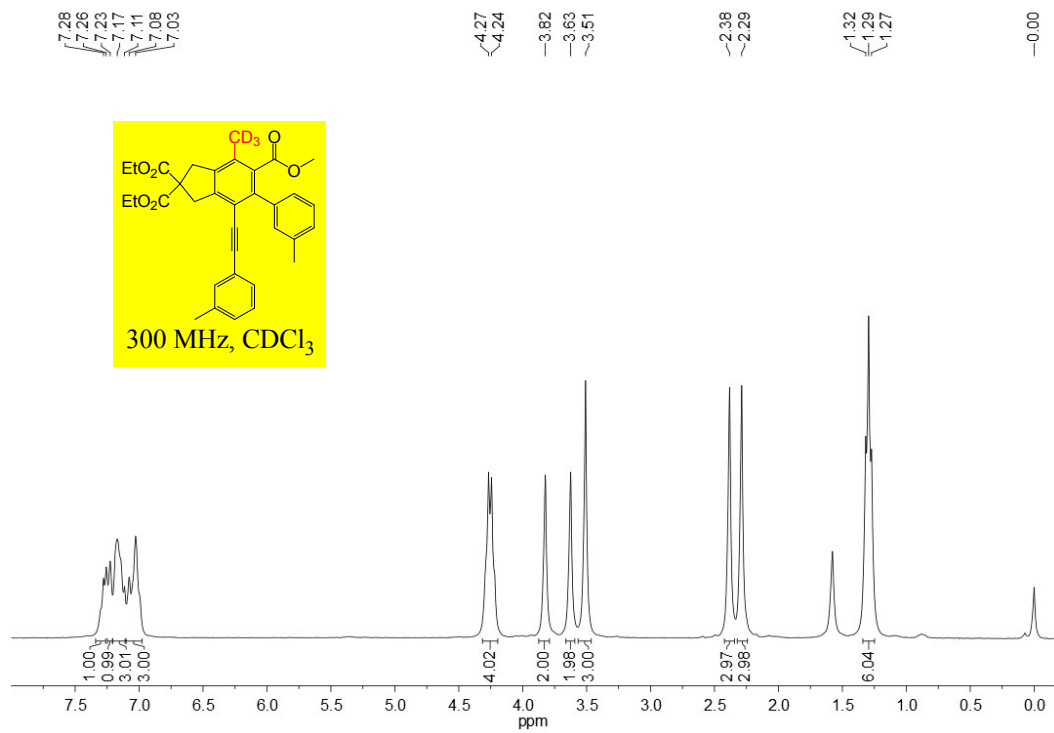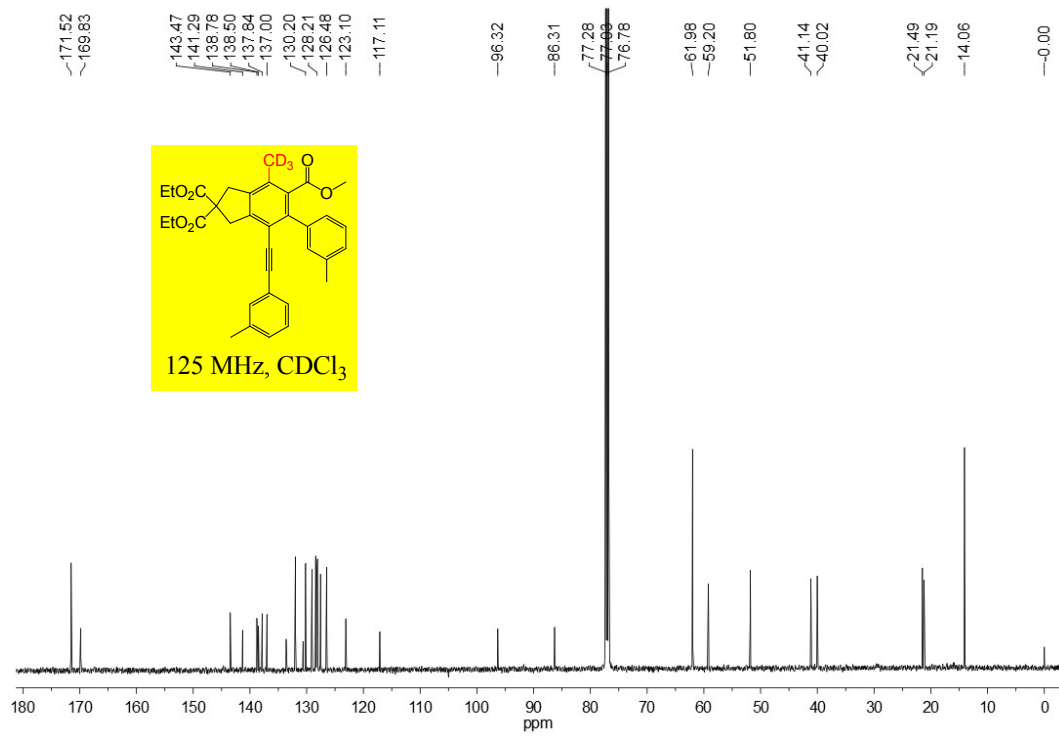



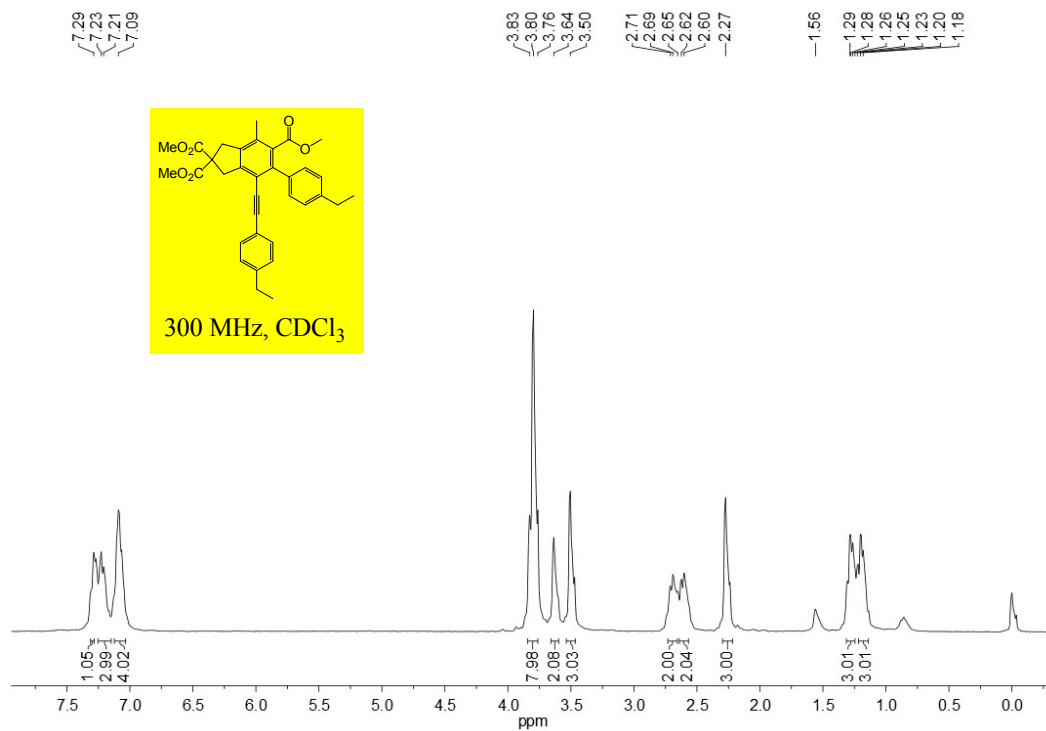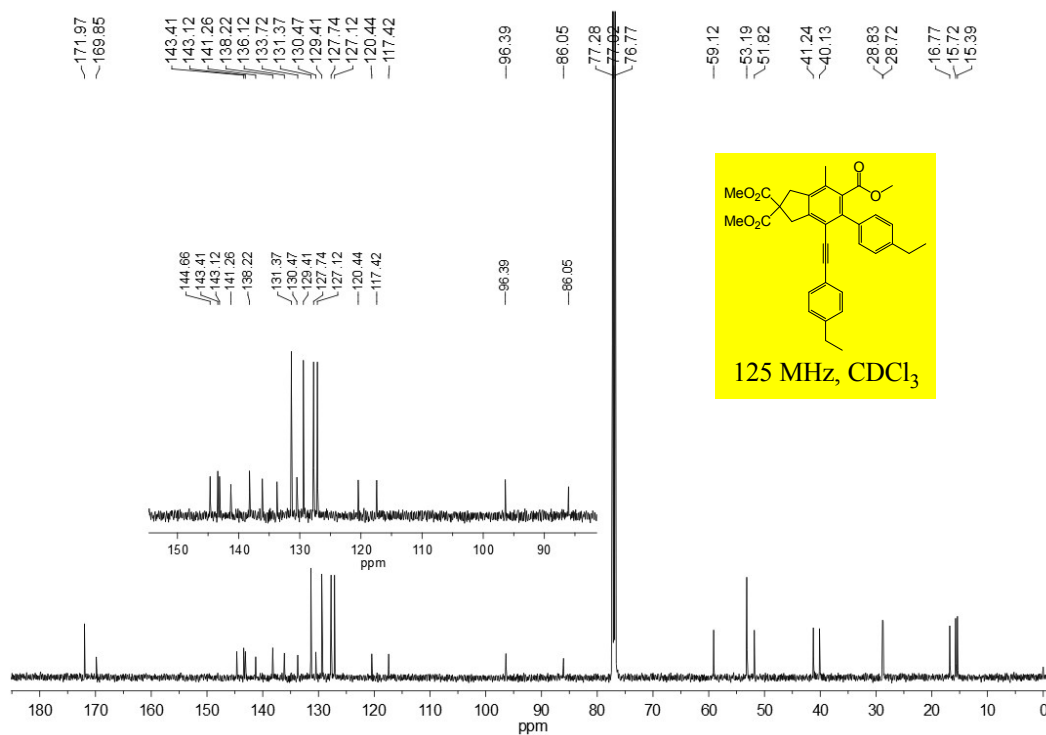

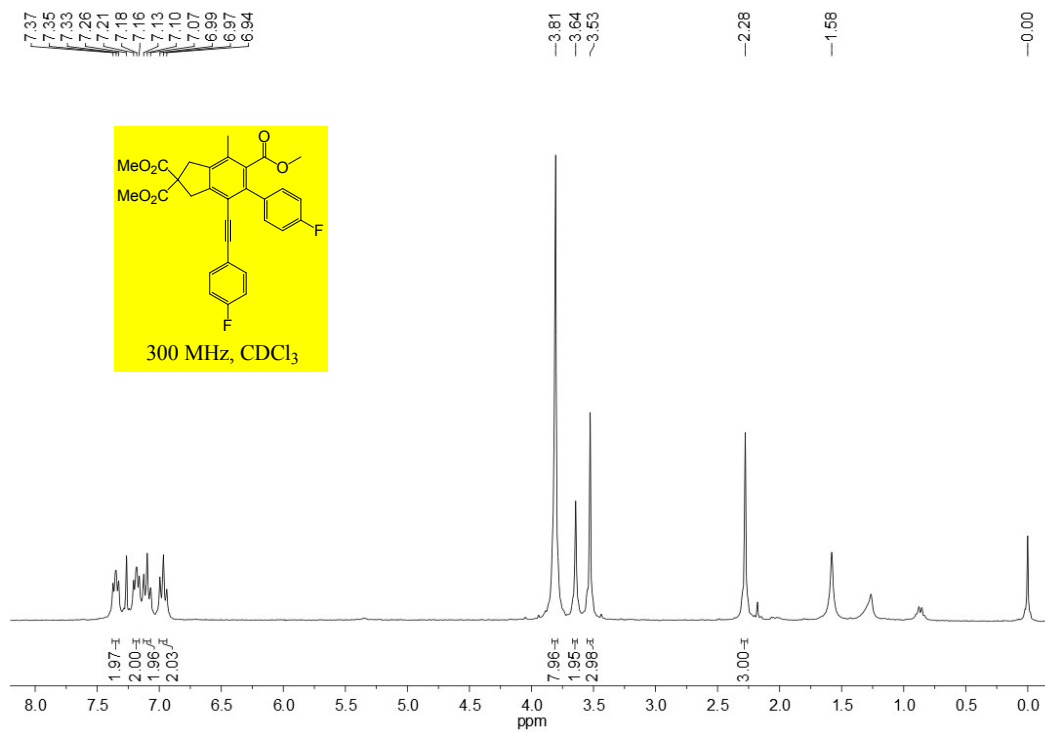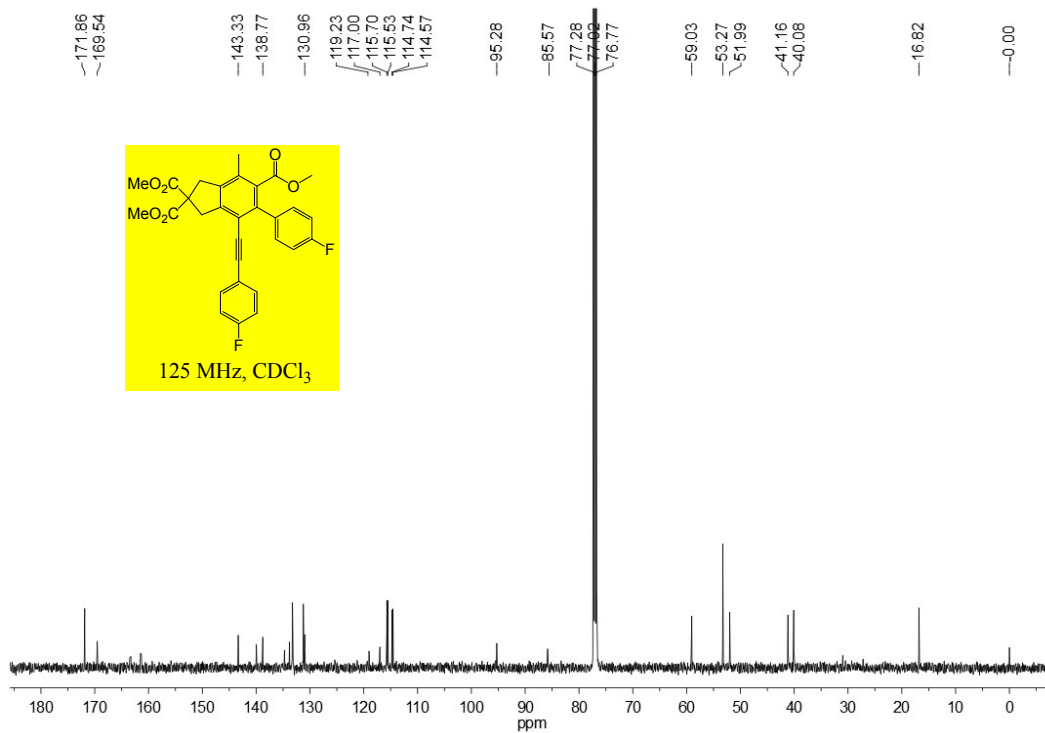

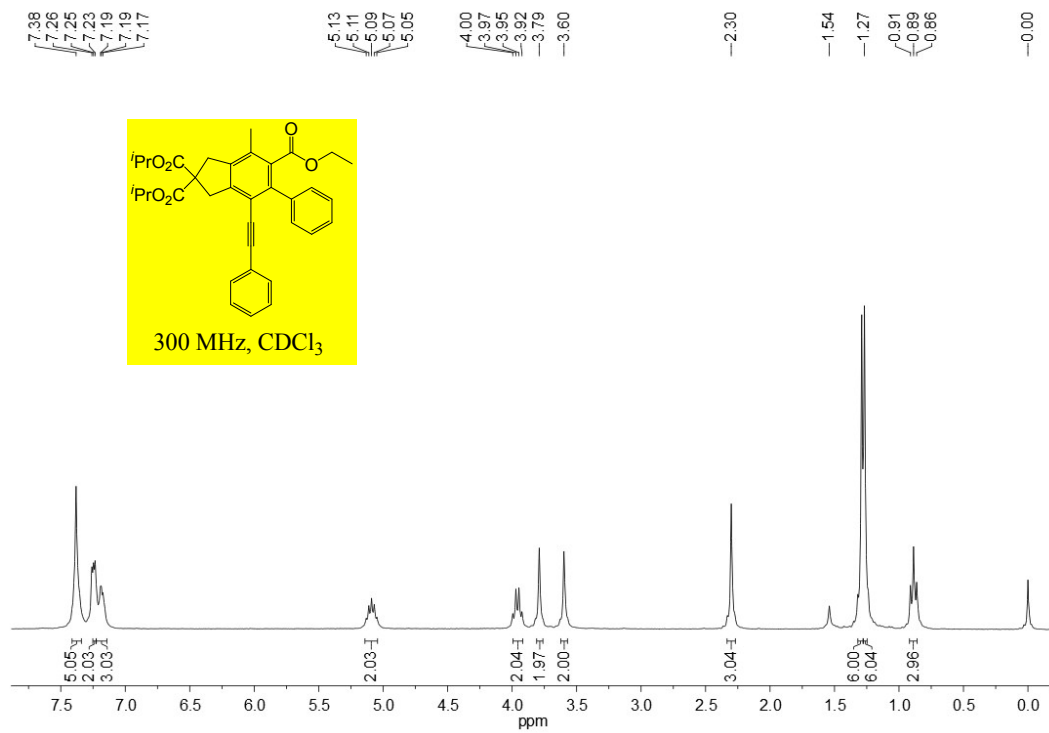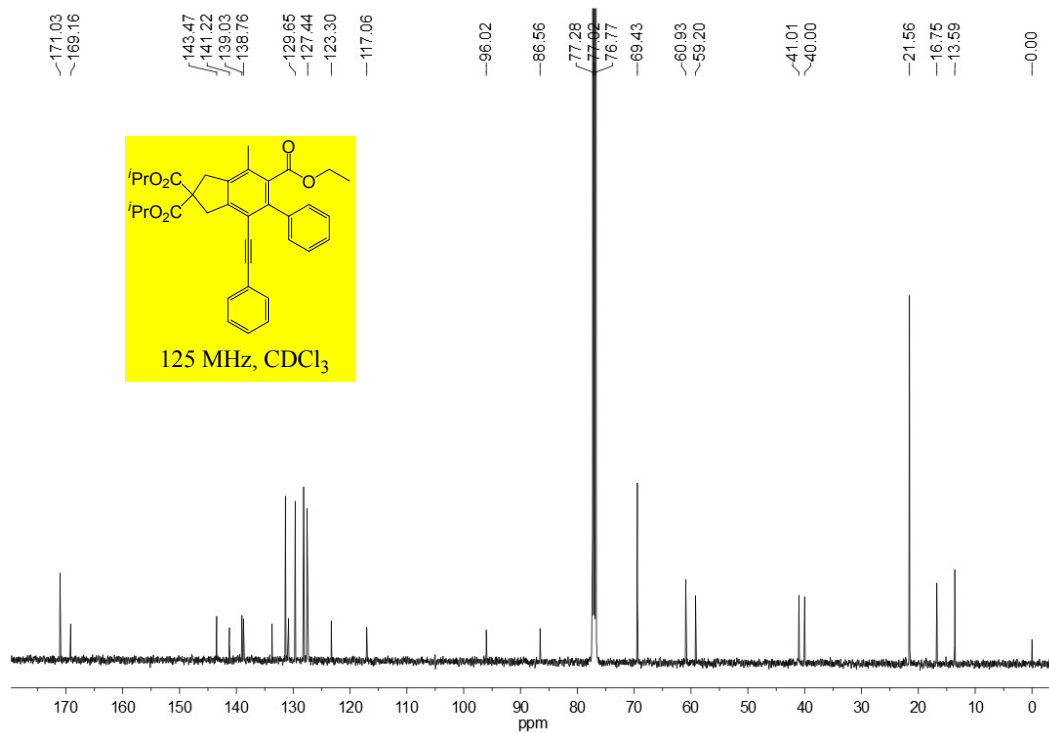

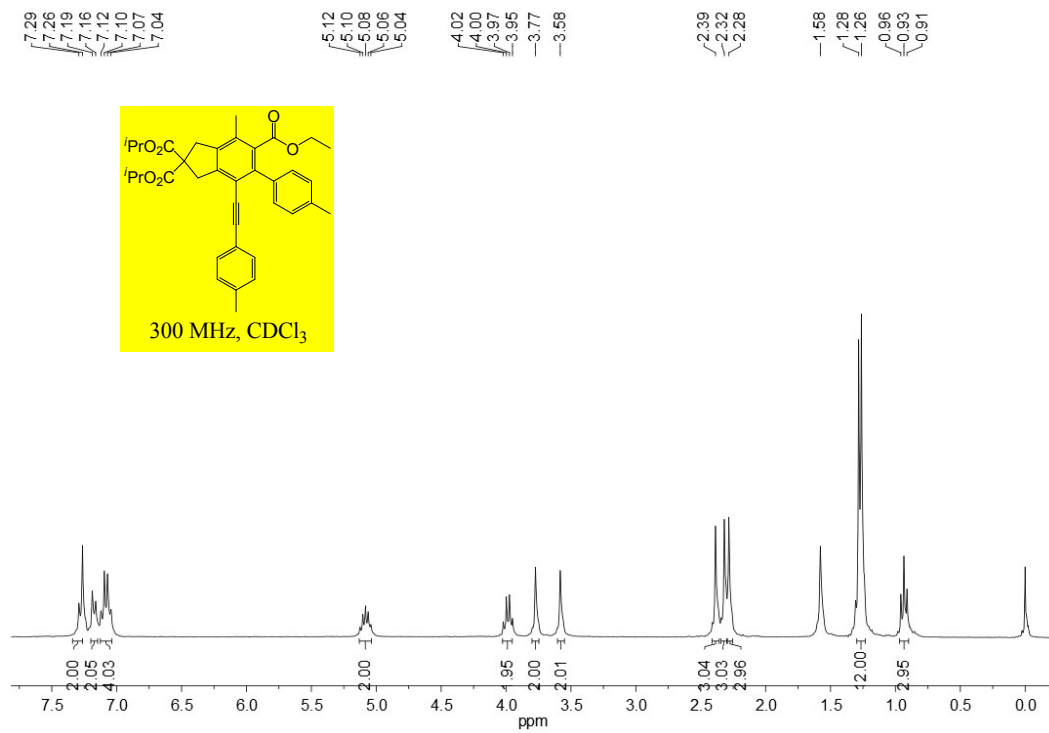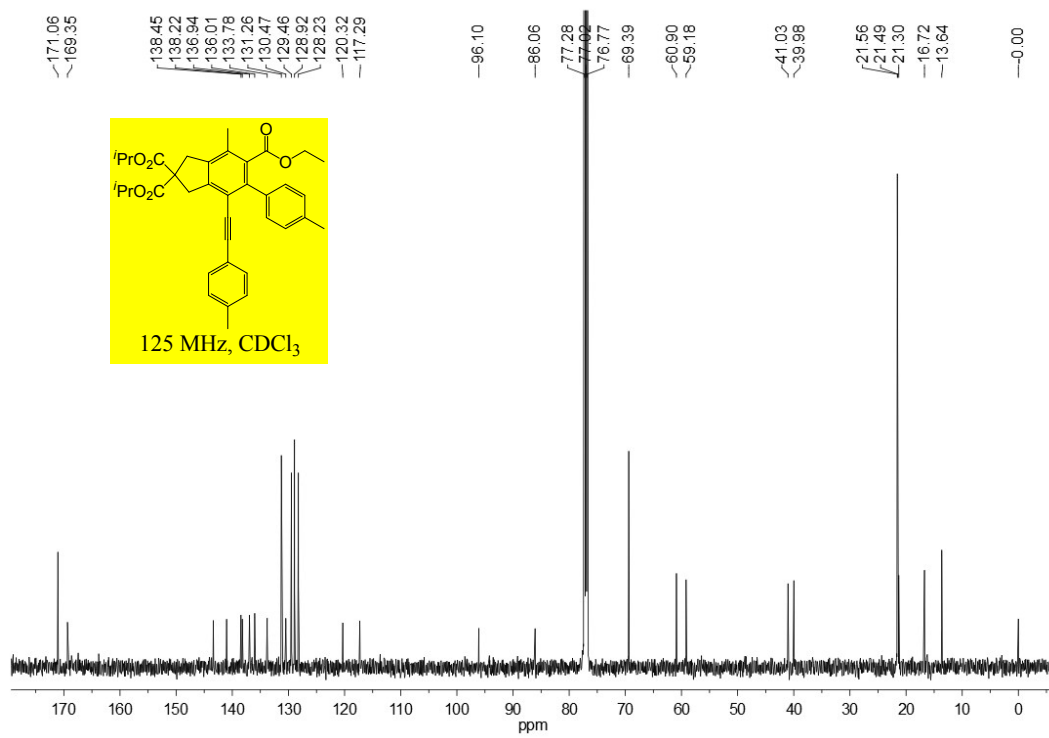

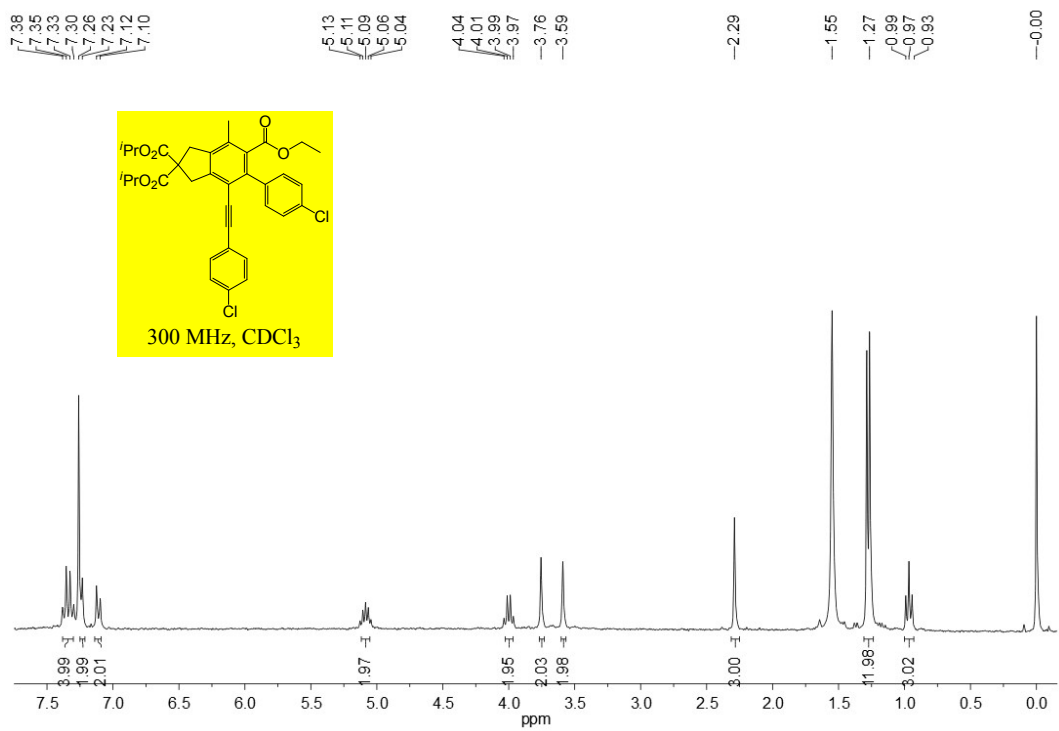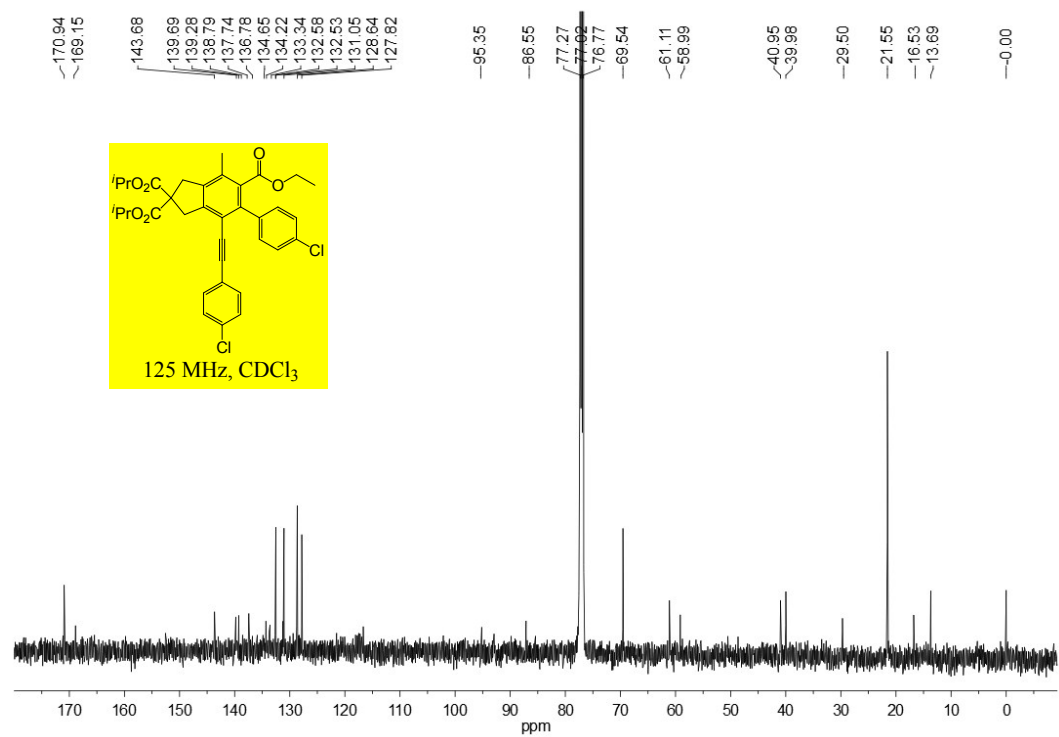

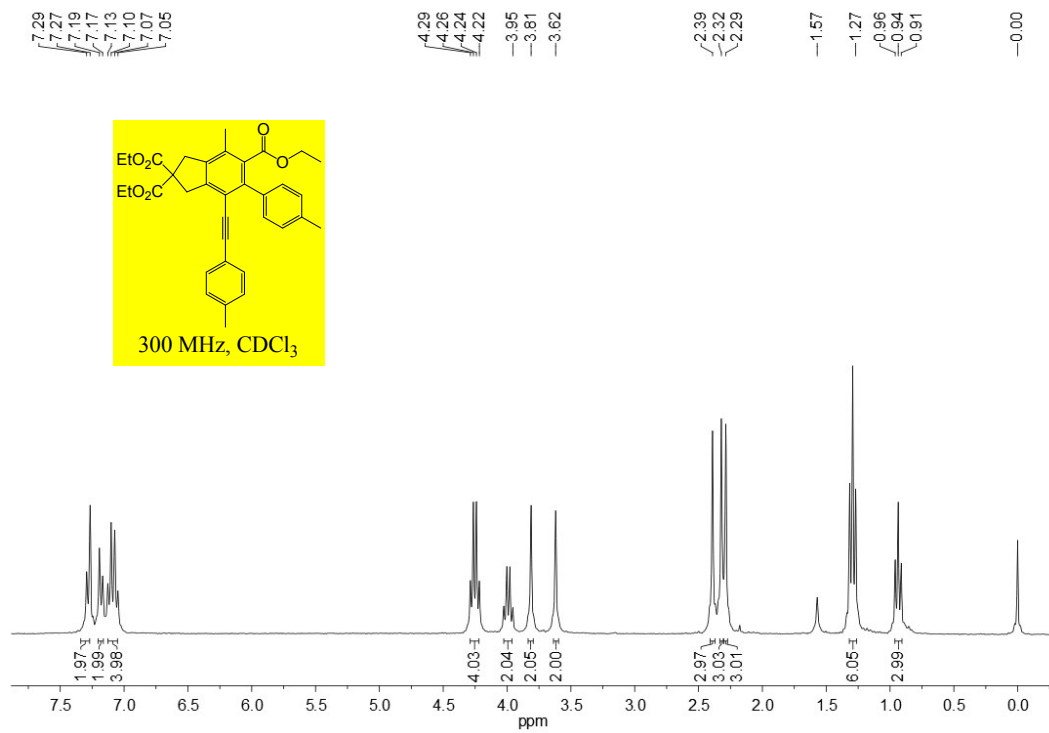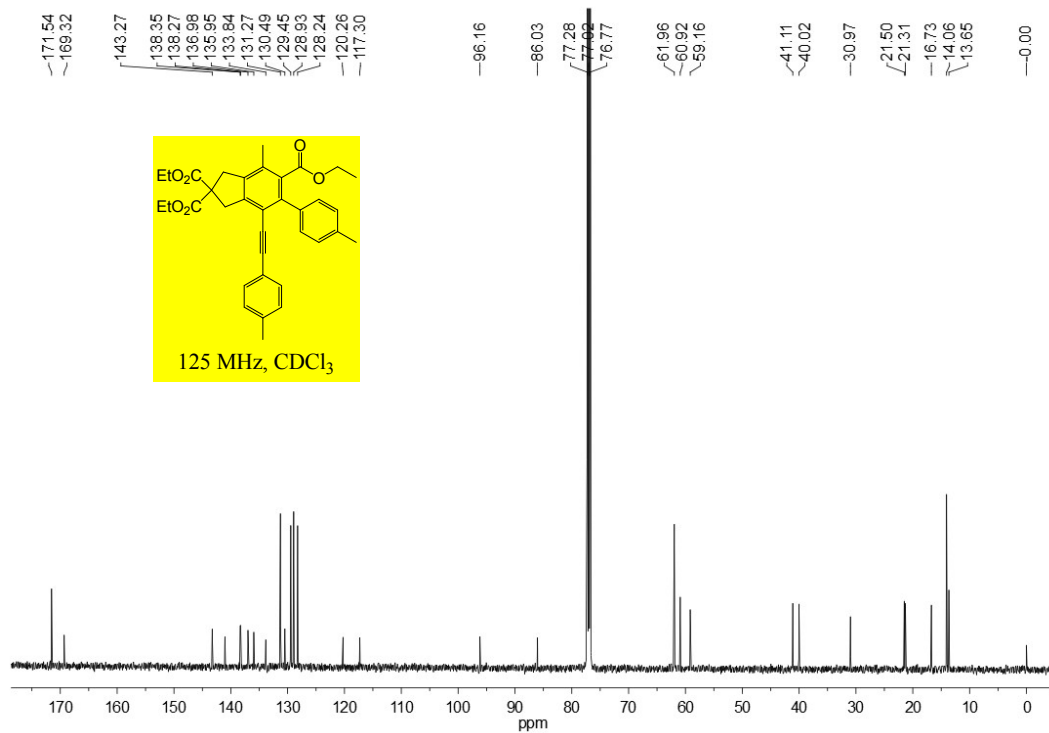

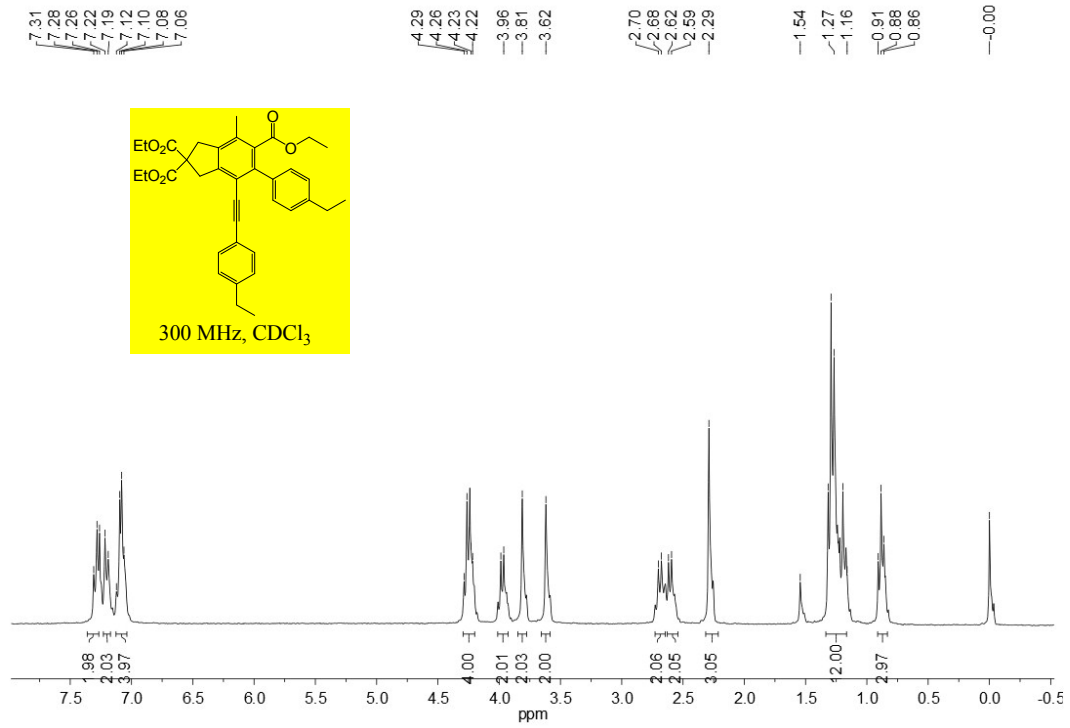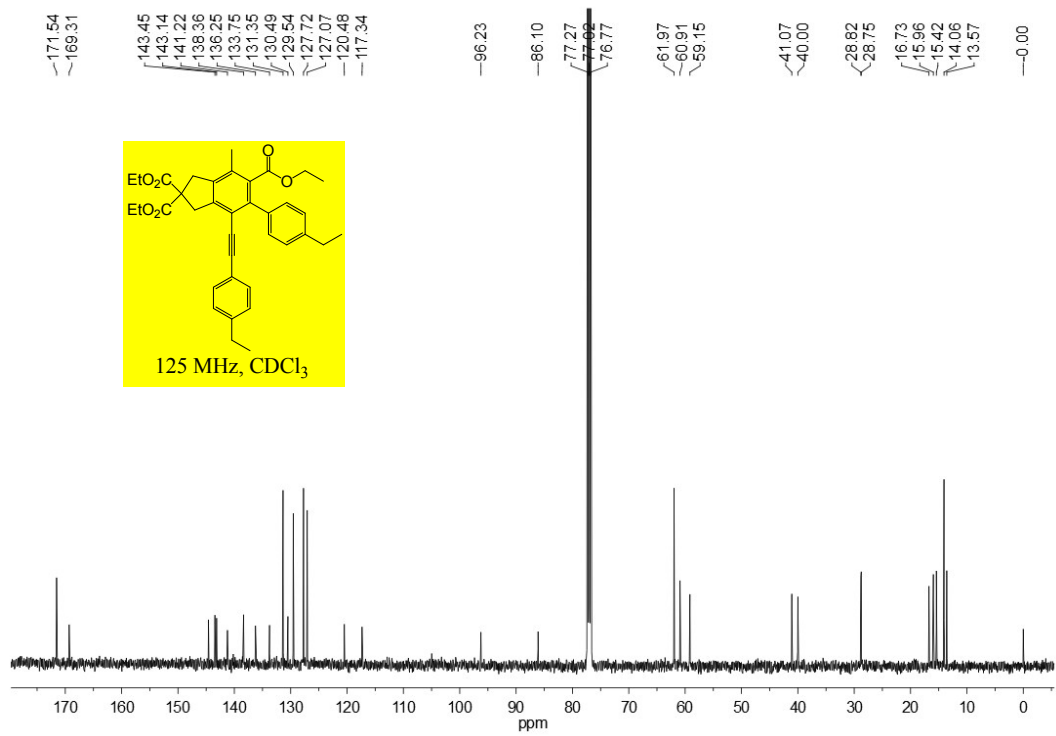

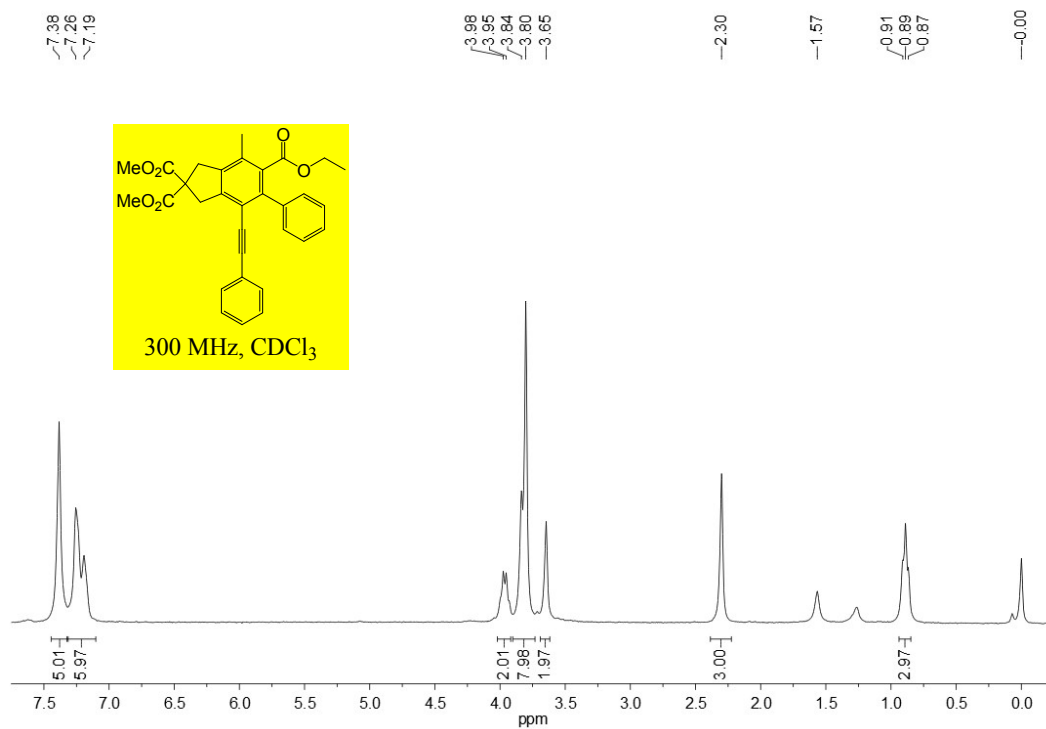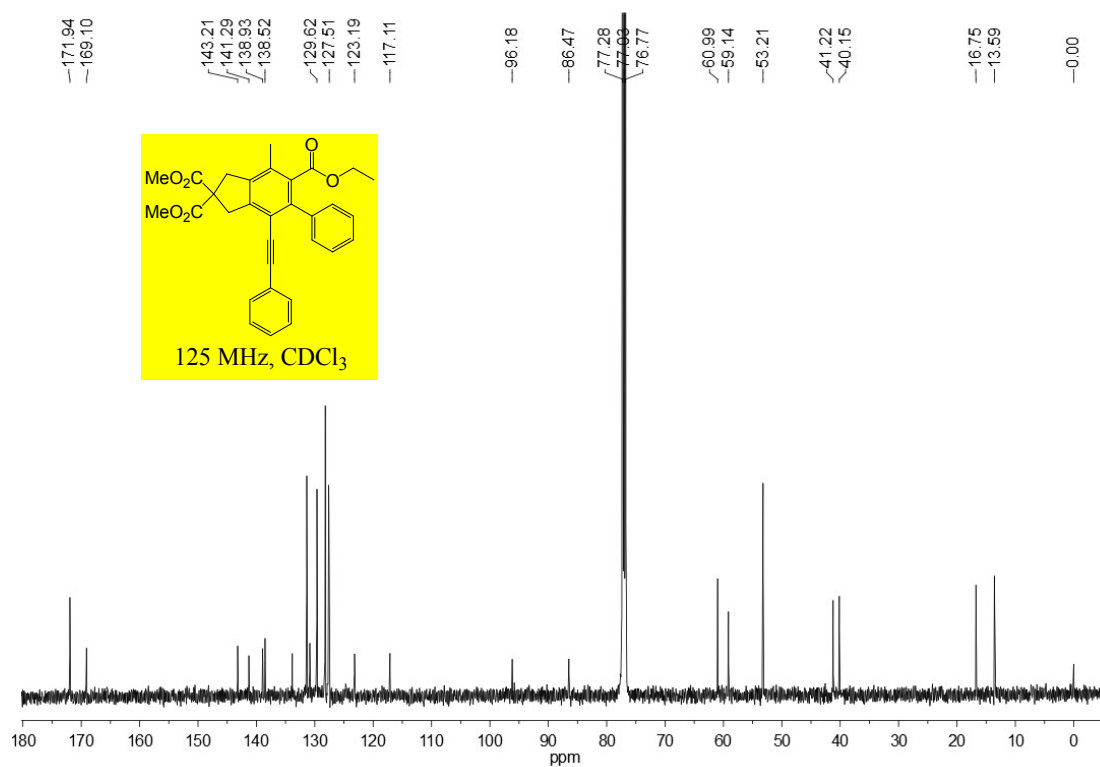



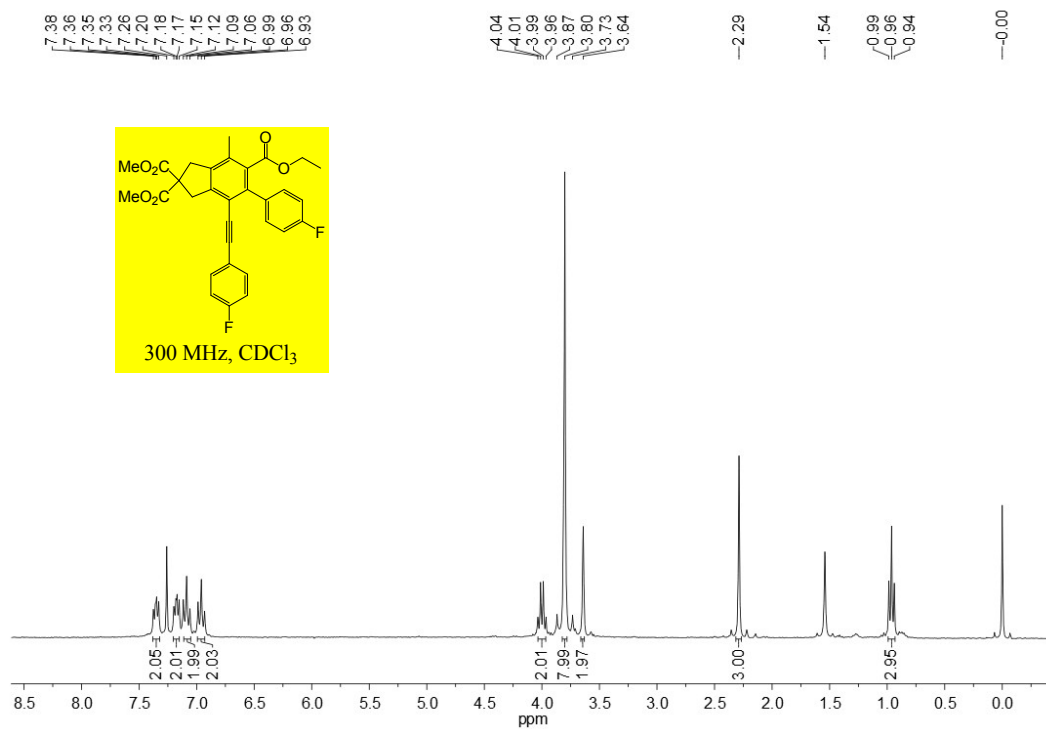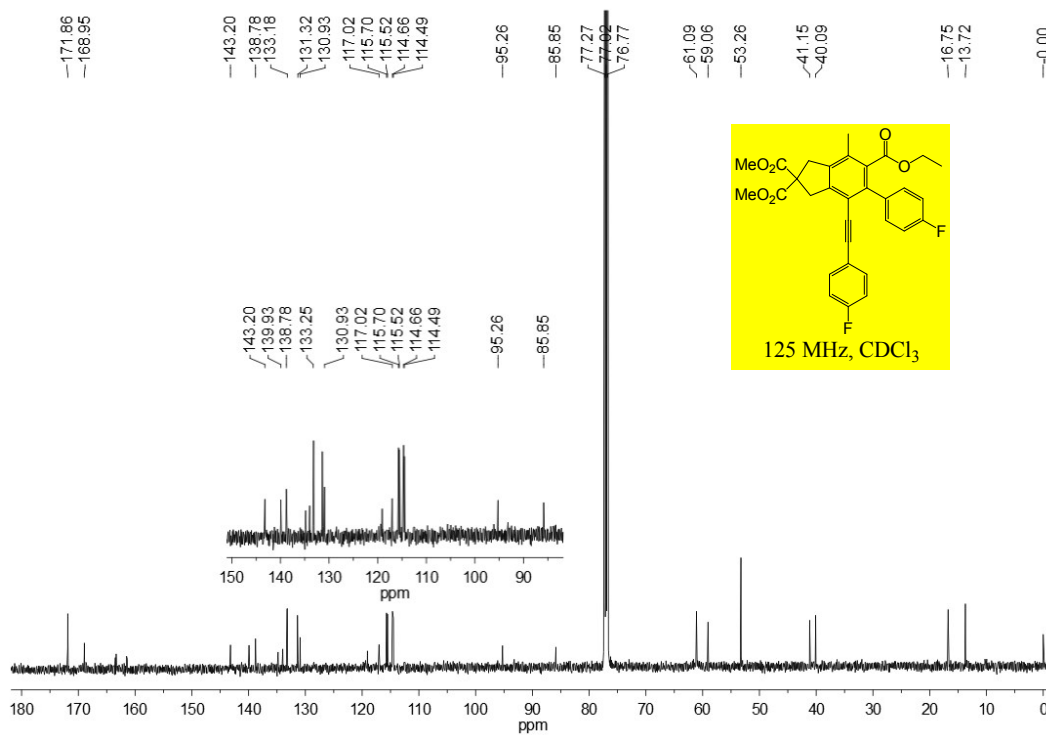

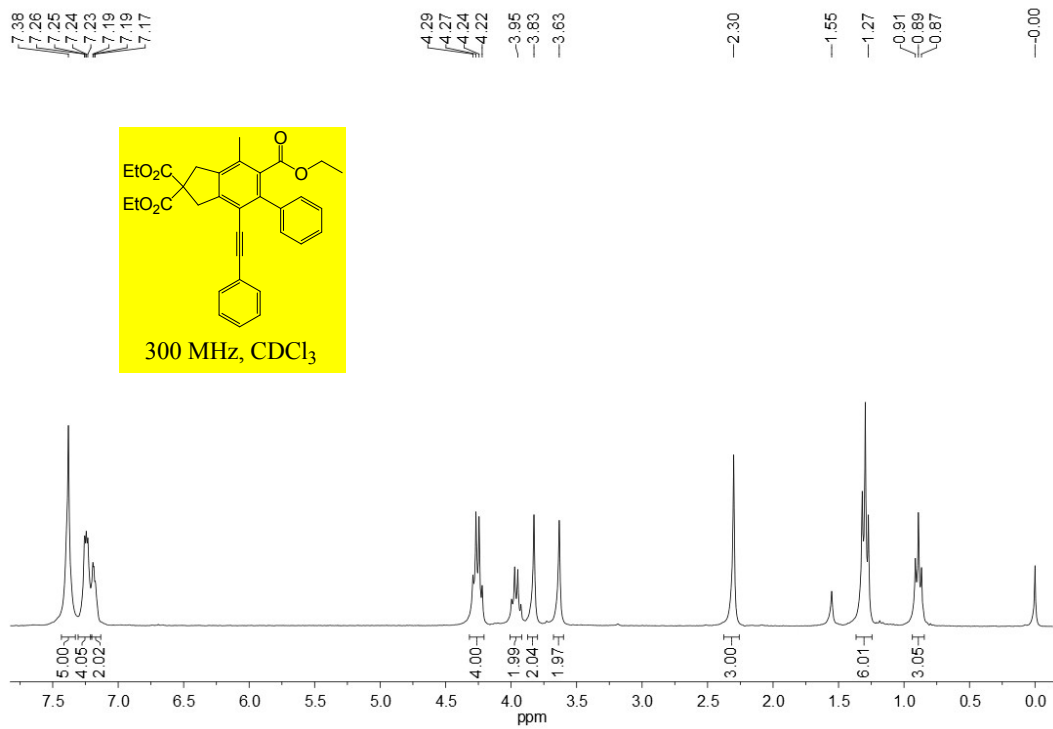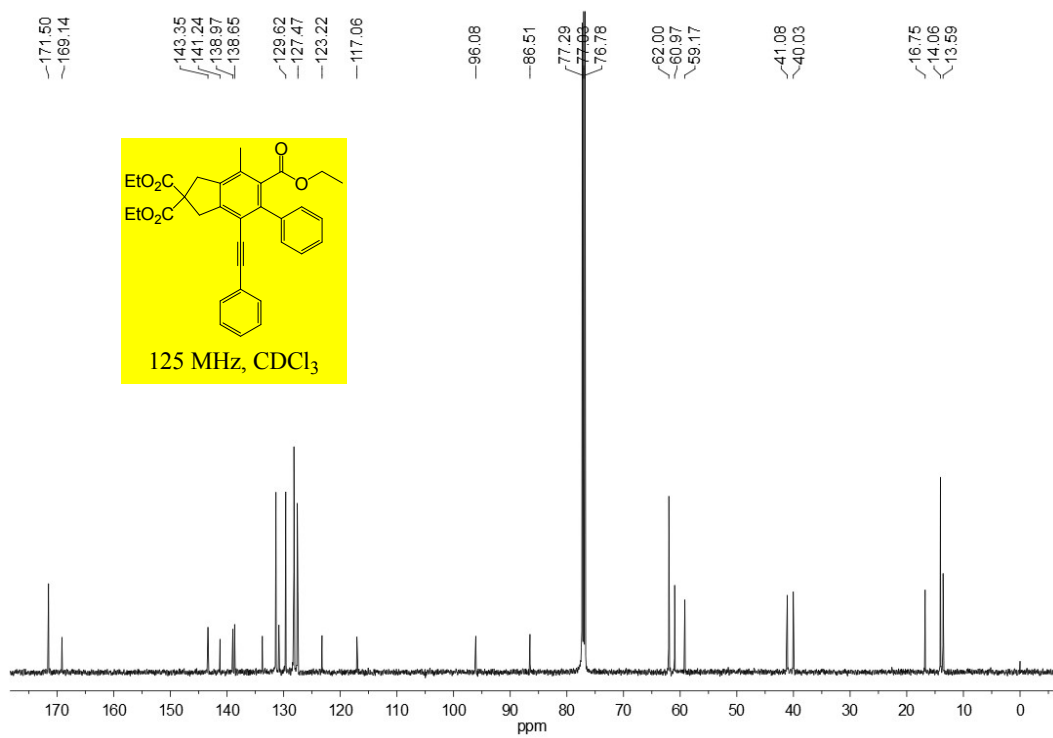

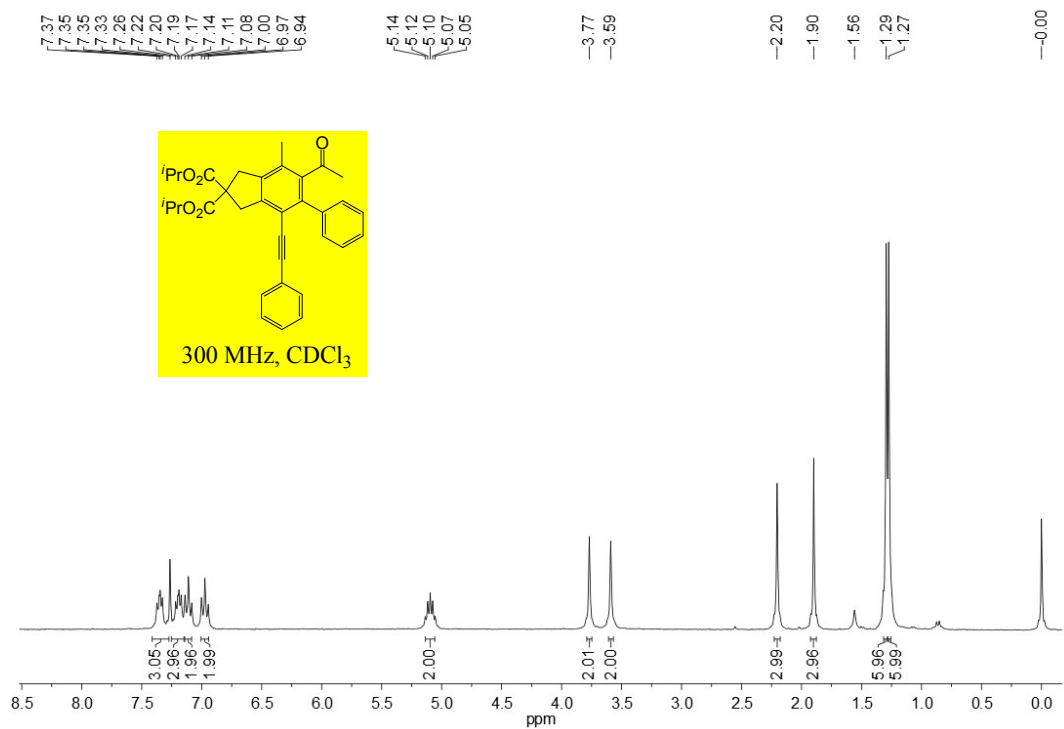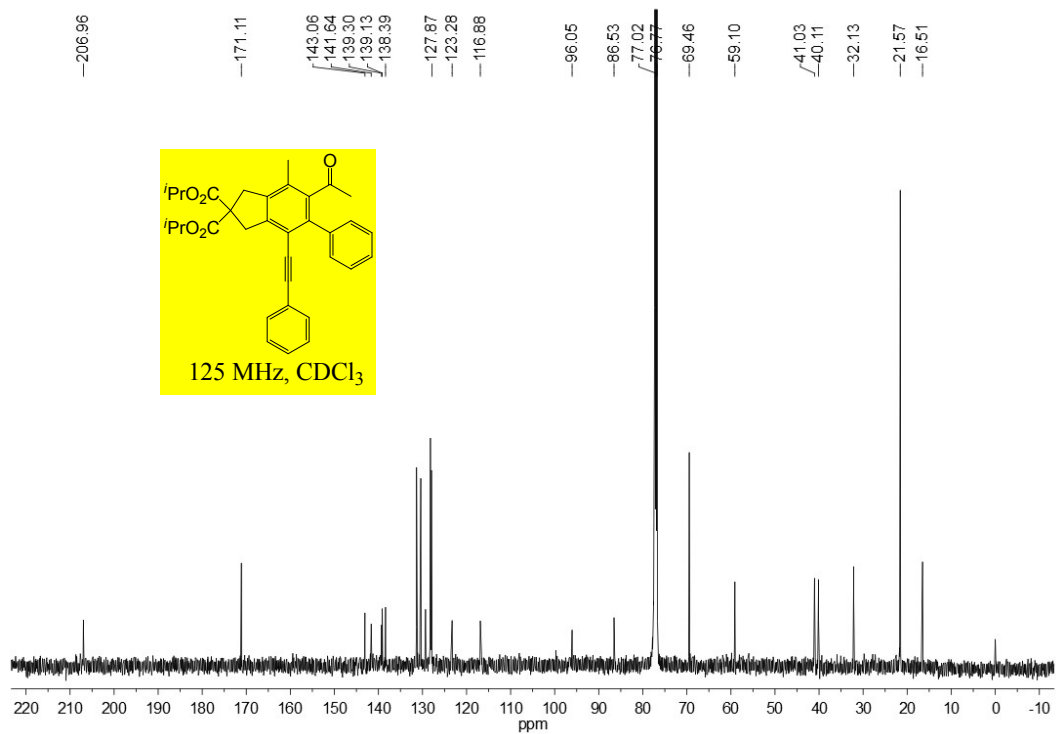

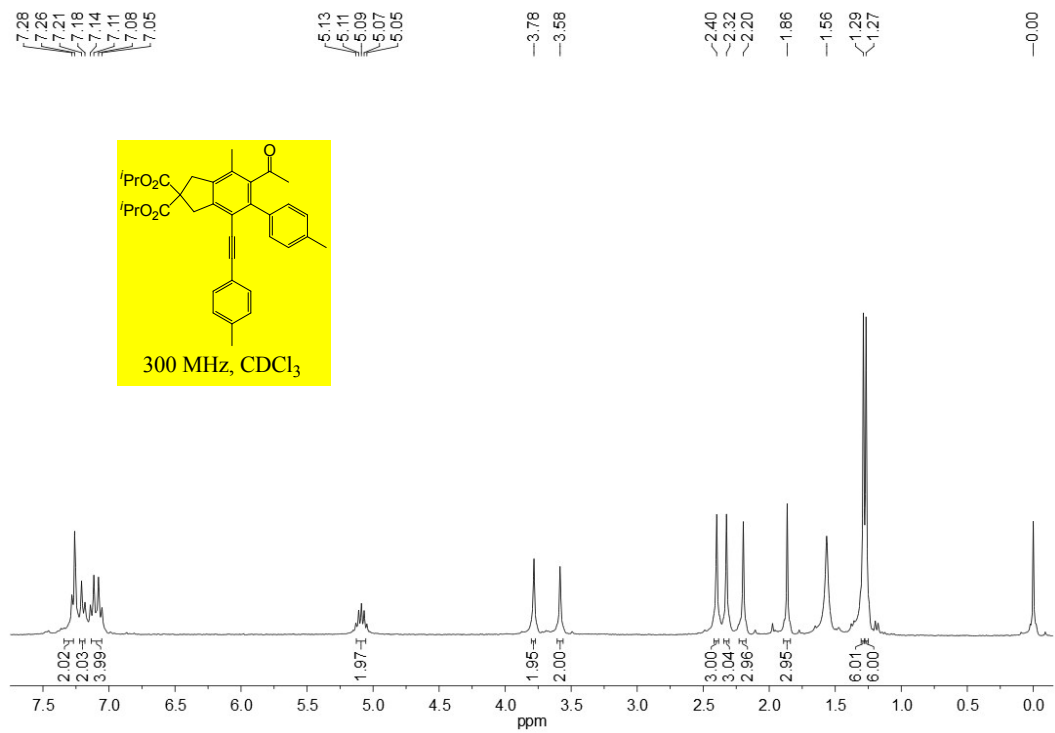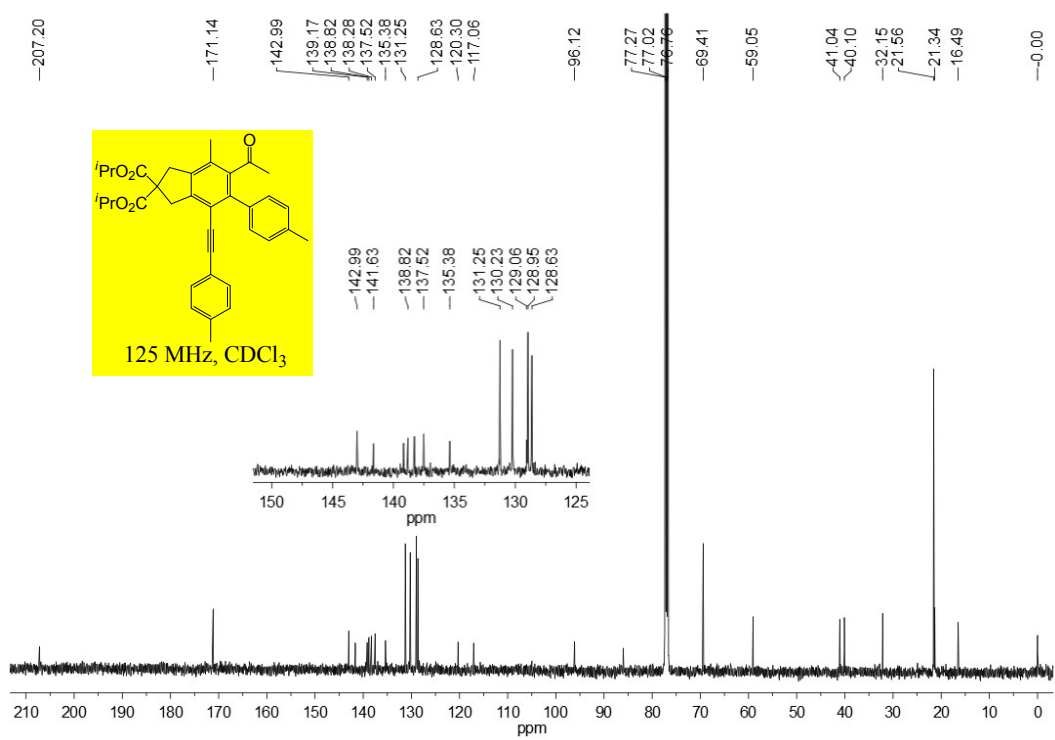

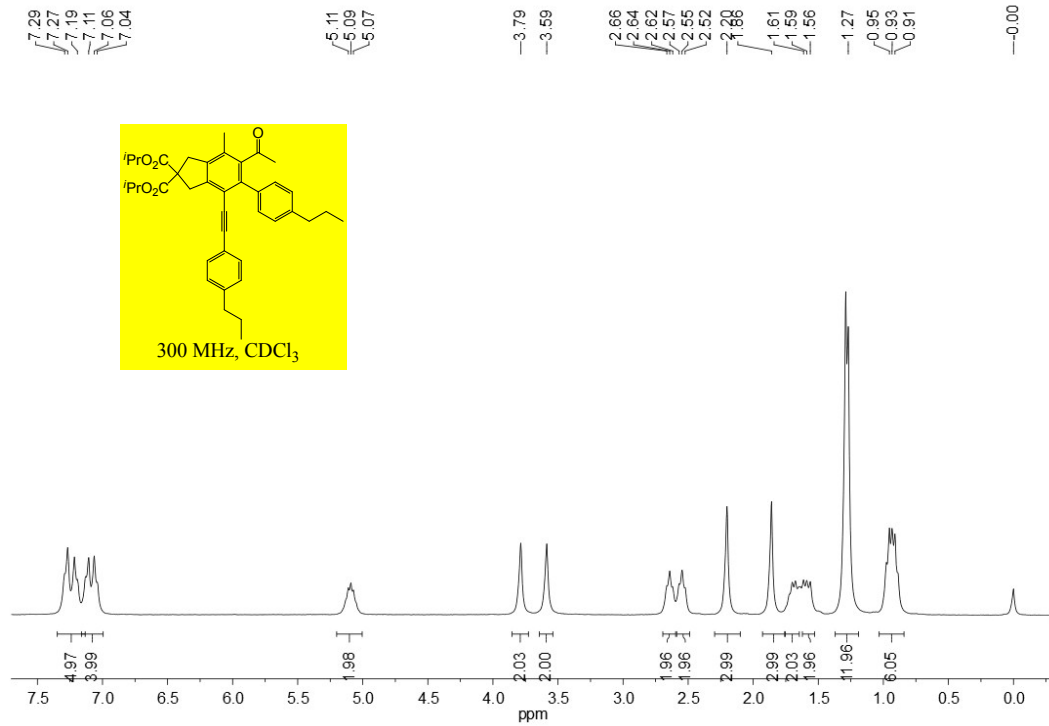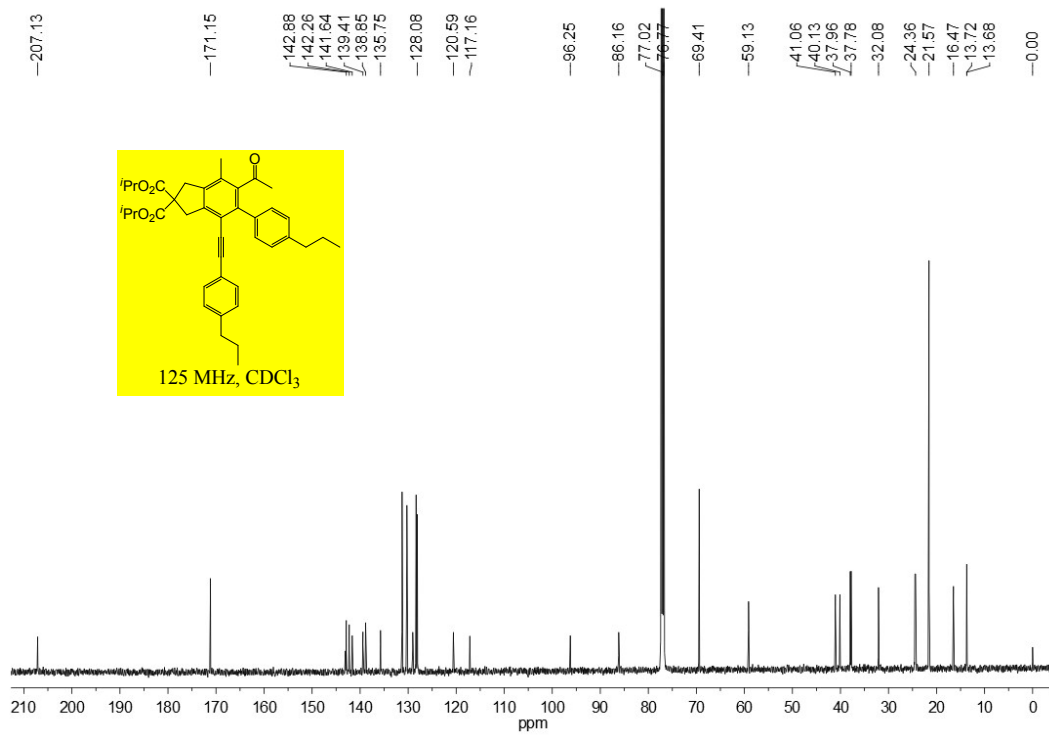

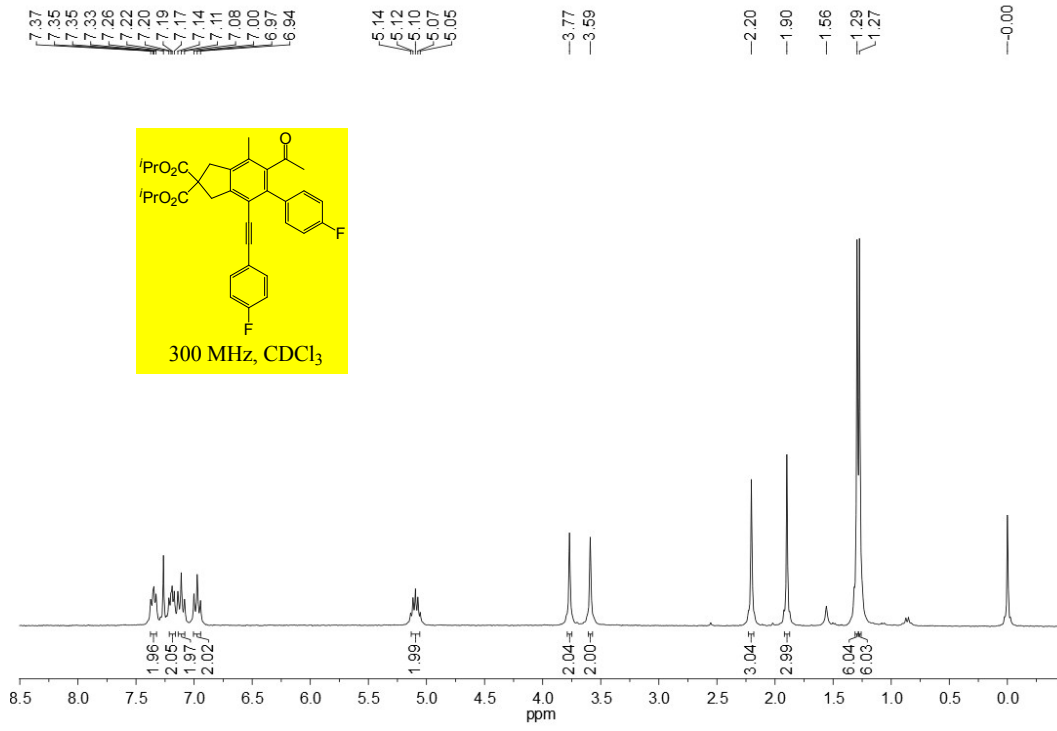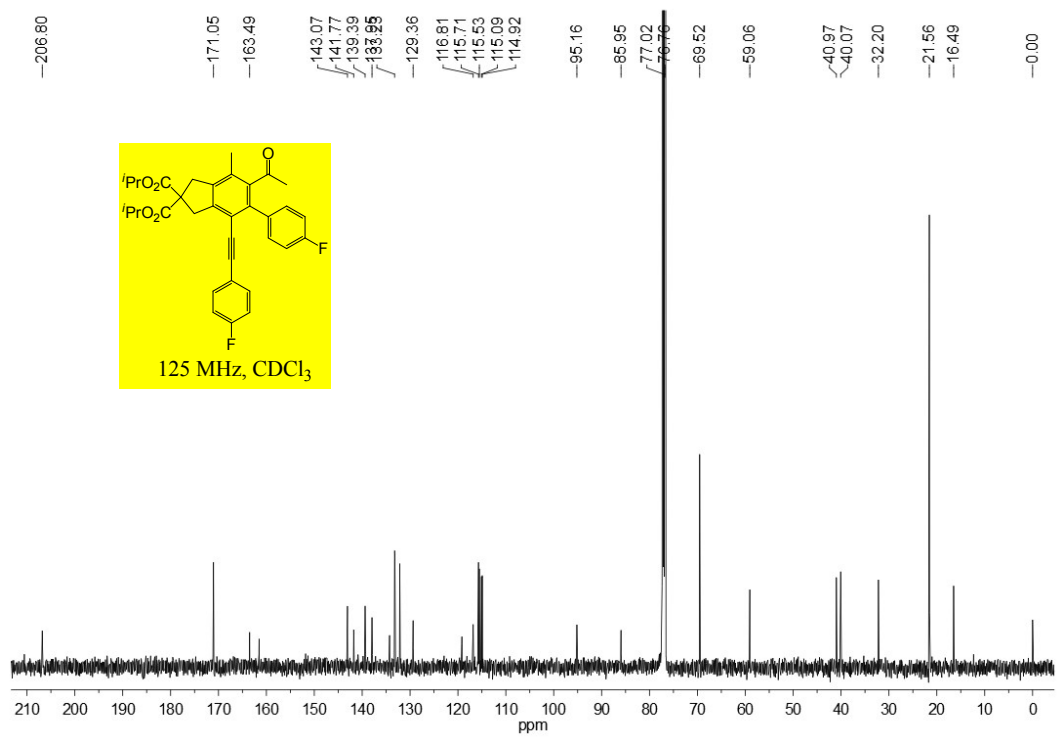

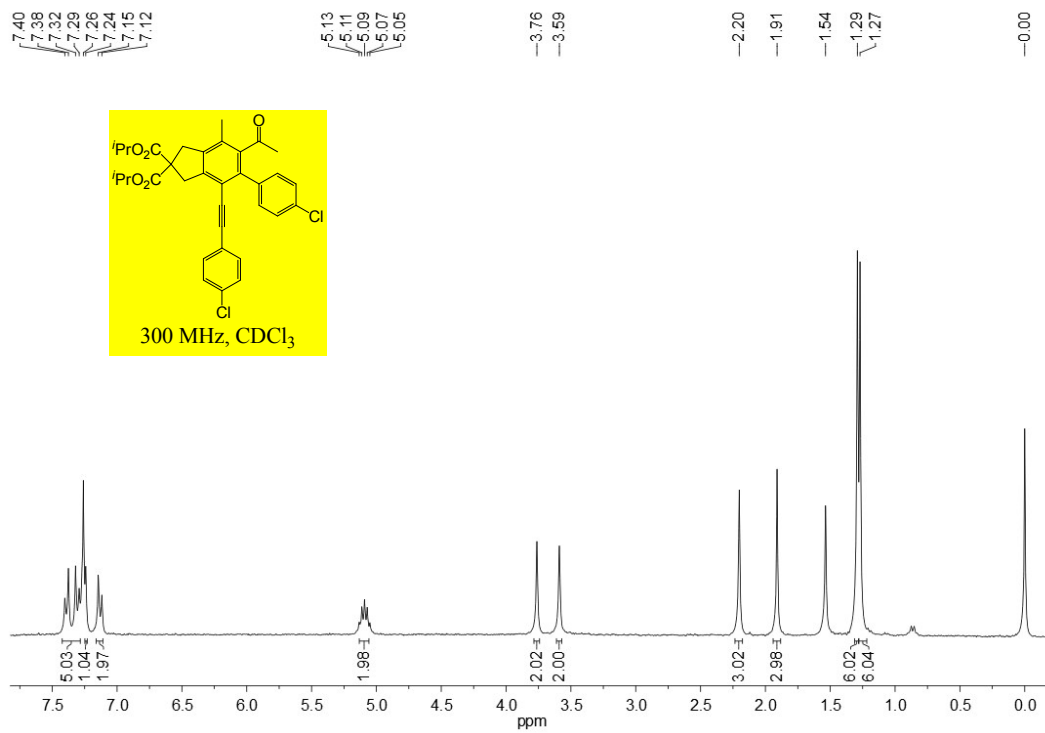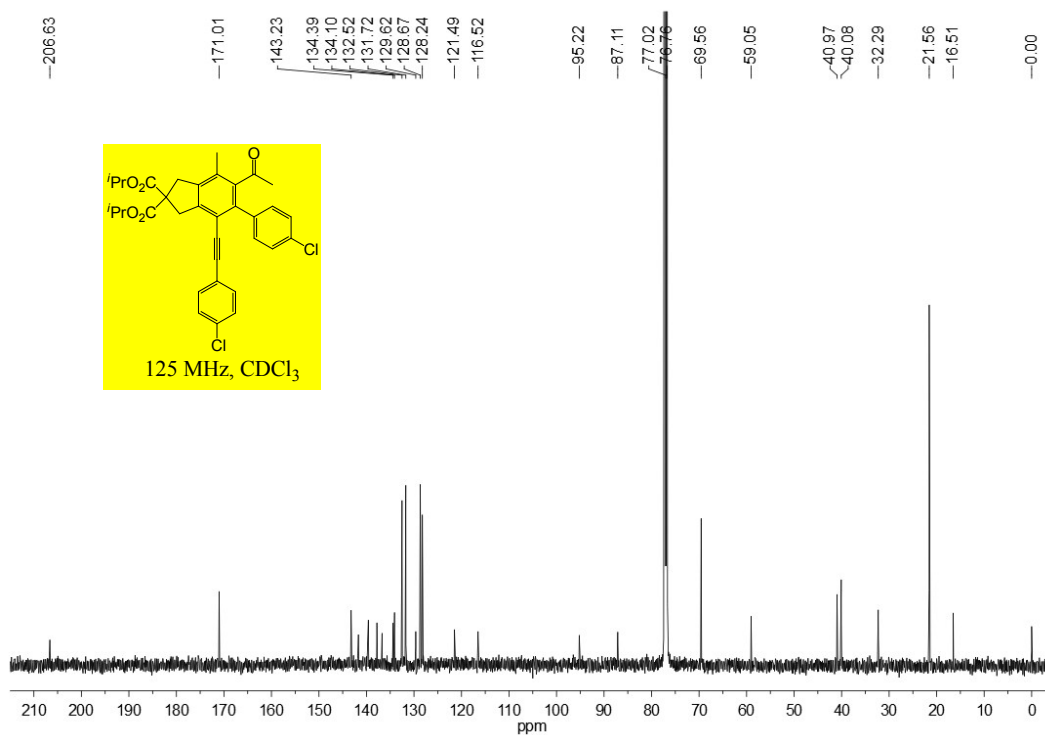

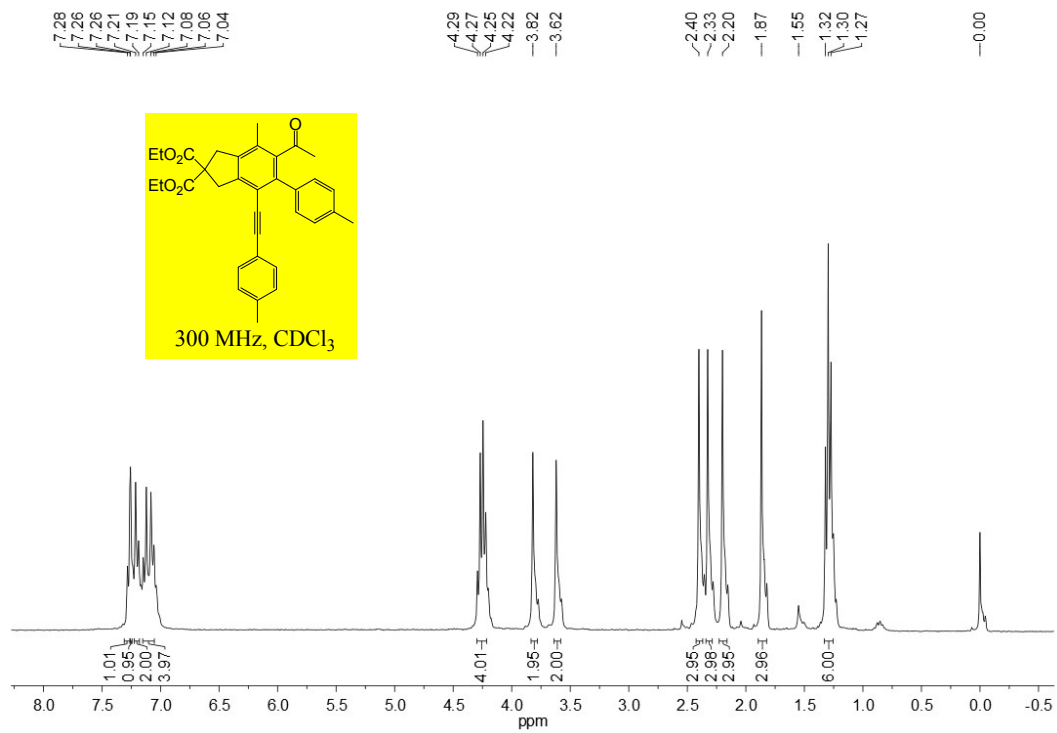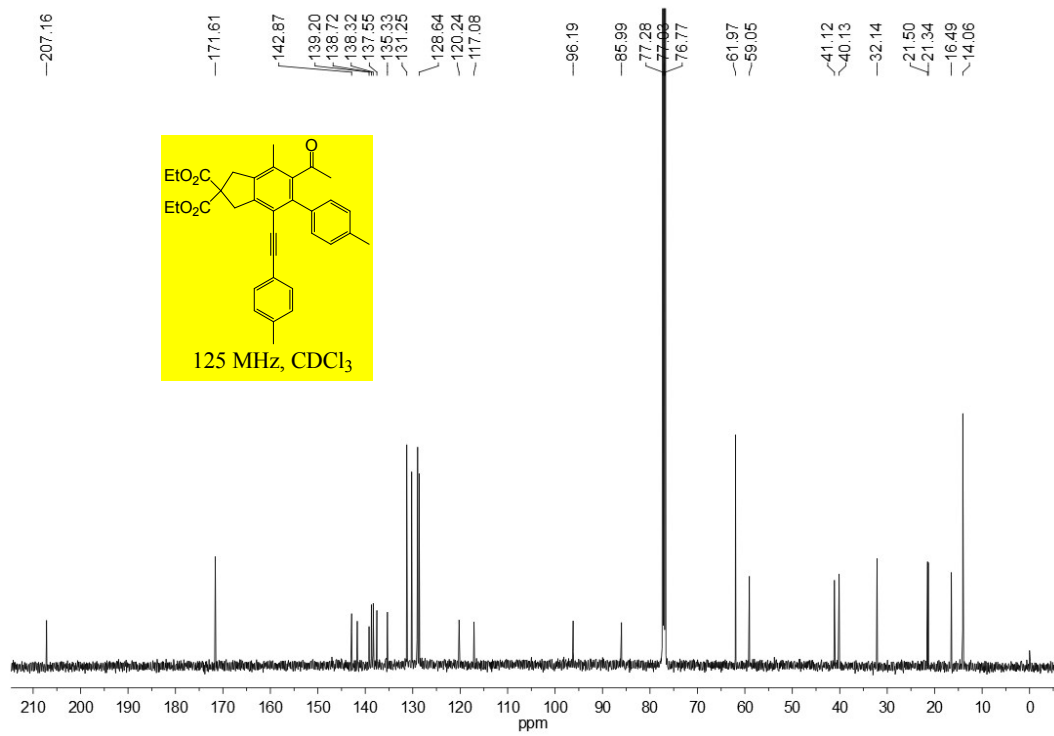



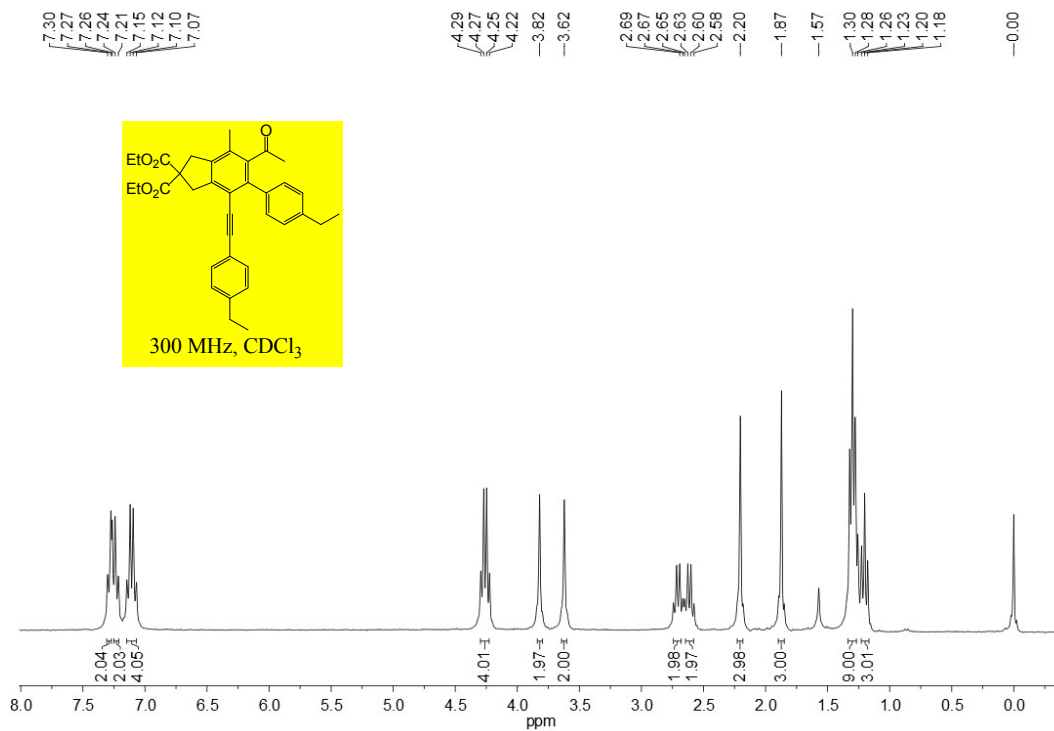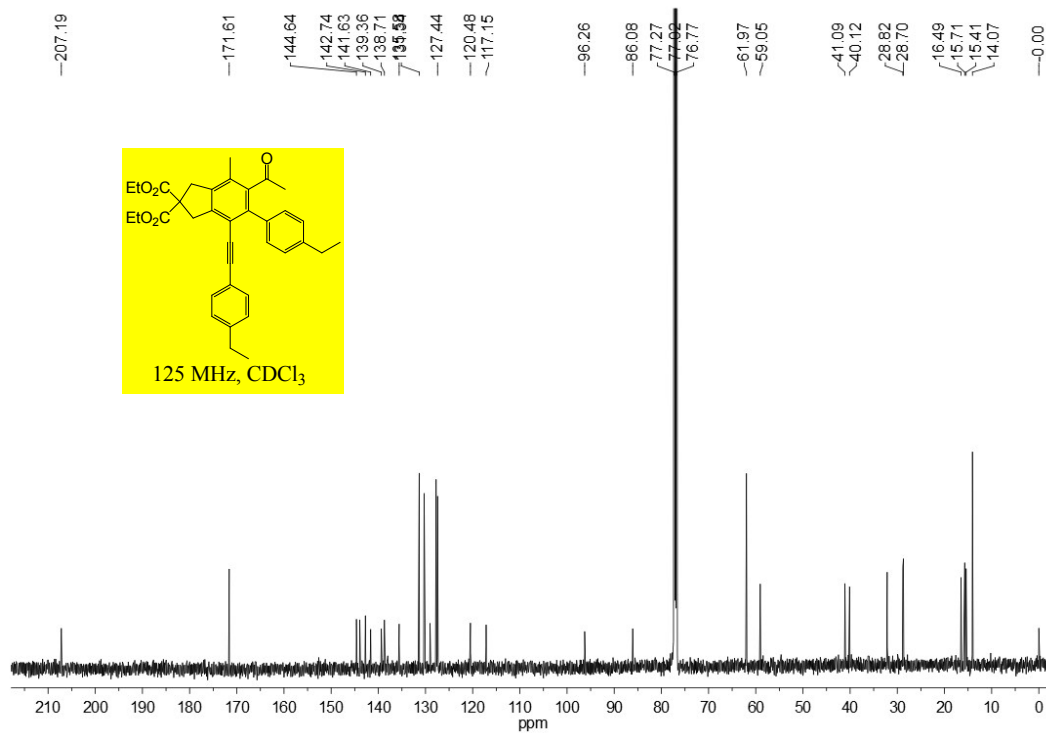

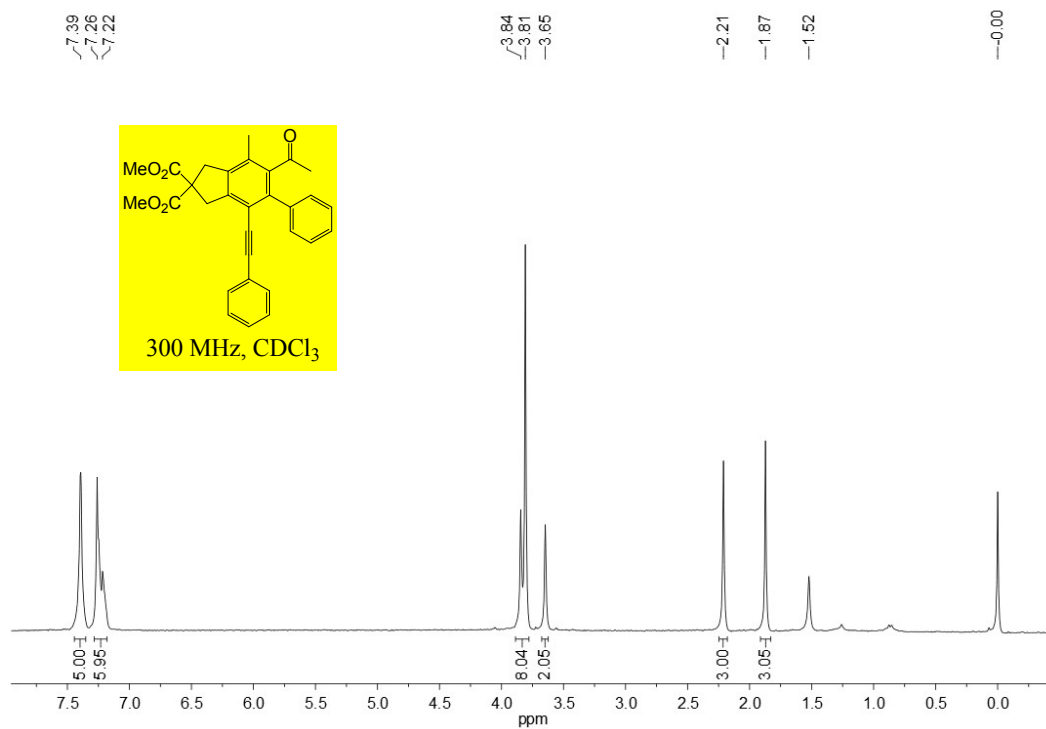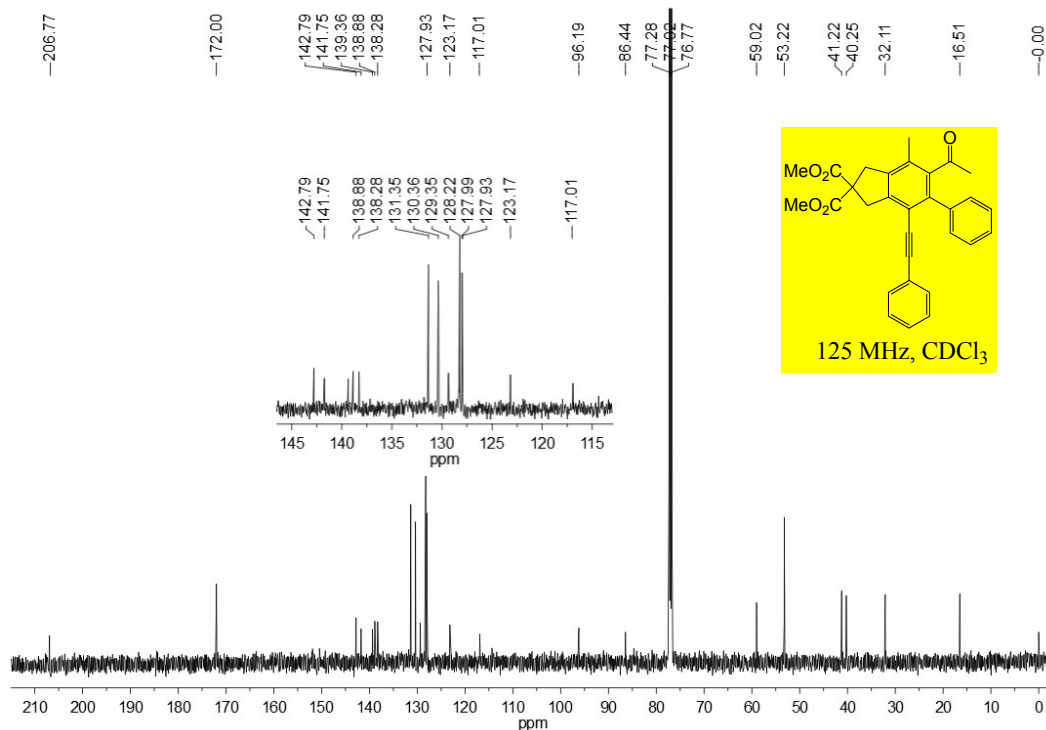

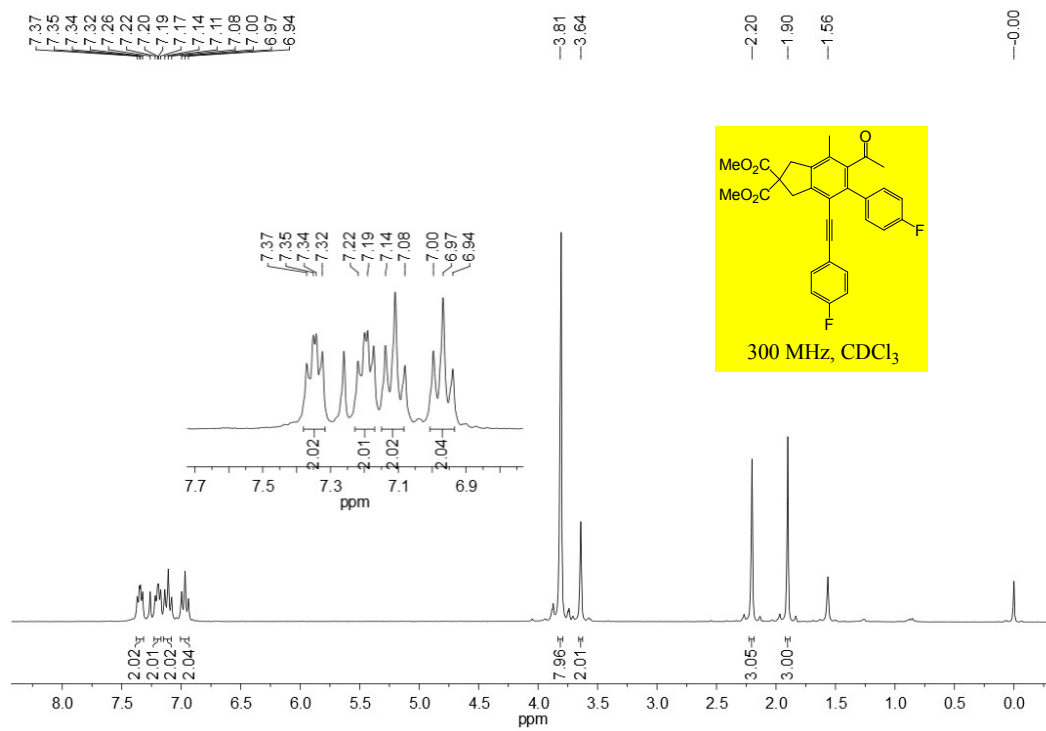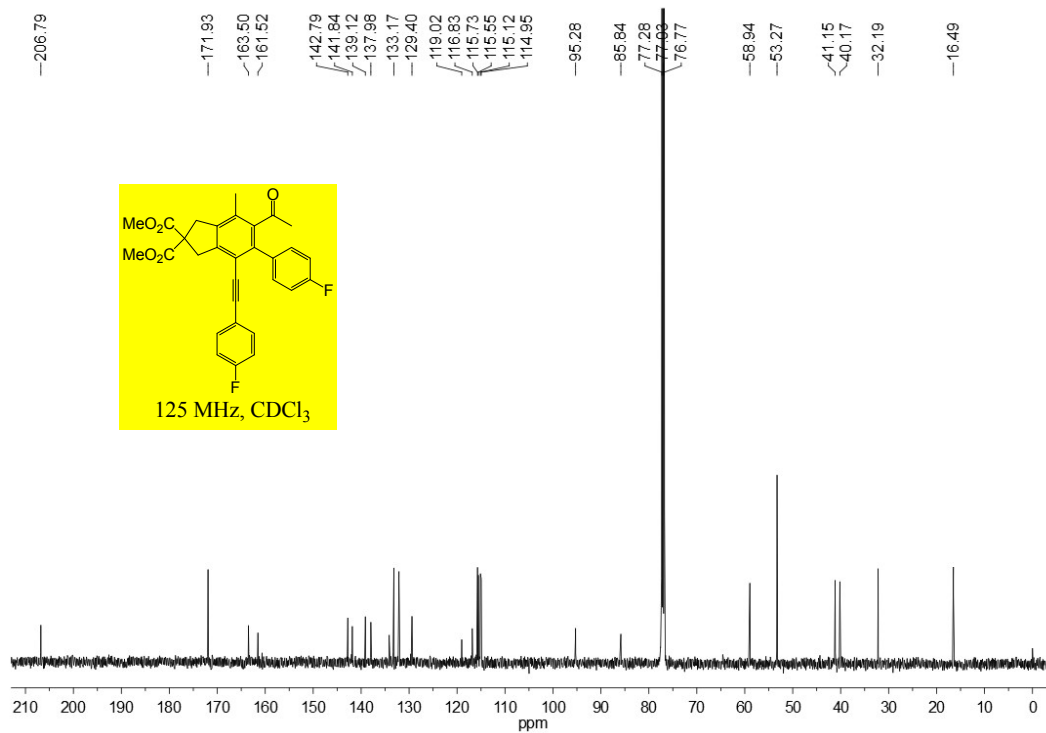

Supplement: c9qo00621d1.pdf [file c9qo00621d1.pdf]
